1 PICH promotes SUMOylated TopoisomeraseII $\alpha$  dissociation from mitotic centromeres for proper  
2 chromosome segregation  
3

4 Victoria Hassebroek<sup>1</sup>, Hyewon Park<sup>1</sup>, Nootan Pandey<sup>1</sup>, Brooklyn T. Lerbakken<sup>1</sup>, Vasilisa Aksenova<sup>2</sup>,  
5 Alexei Arnaoutov<sup>2</sup>, Mary Dasso<sup>2</sup> and Yoshiaki Azuma<sup>1\*</sup>  
6

7 **Affiliation:** <sup>1</sup>Department of Molecular Biosciences, University of Kansas, Lawrence, Kansas, U.S.A,  
8 66045, <sup>2</sup> Division of Molecular and Cellular Biology, National Institute for Child Health and Human  
9 Development, National Institutes of Health, Bethesda, MD 20892, USA.  
10

11 **\*To whom correspondence should be addressed:** Yoshiaki Azuma: Department of Molecular  
12 Biosciences, University of Kansas, Lawrence, Kansas, U.S.A, 66045

13 [azumay@ku.edu](mailto:azumay@ku.edu); Tel. (785)-864-7540; Fax. (785)-864-5294  
14

15 **Running title:** PICH targets SUMOylated TopoII $\alpha$   
16

### 17 **Summary Statement**

18 Polo-like kinase interacting checkpoint helicase (PICH) interacts with SUMOylated proteins to mediate  
19 proper chromosome segregation during mitosis. The results demonstrate that PICH promotes dissociation  
20 of SUMOylated TopoisomeraseII $\alpha$  from chromosomes and that function leads to proper chromosome  
21 segregation.  
22

### 23 **Abbreviations**

|                    |                                                  |
|--------------------|--------------------------------------------------|
| 24 TopoII $\alpha$ | Topoisomerase II $\alpha$                        |
| 25 PICH            | Polo-like kinase interacting checkpoint helicase |
| 26 SPR             | Strand passage reaction                          |
| 27 SUMO            | Small ubiquitin-like modifier                    |
| 28 XEE             | Xenopus egg extract                              |
| 29 CSF             | Cytostatic factor                                |
| 30 dnUbc9          | dominant negative E2 SUMO-conjugating enzyme     |
| 31 SENP            | Sentrin-specific protease                        |
| 32 PIAS            | Protein inhibitor of activated STAT              |

33

34 **Keywords:** Chromosome/Mitosis/PICH/SUMO/TopoisomeraseII $\alpha$   
35

36 **Abstract**

37 Polo-like kinase interacting checkpoint helicase (PICH) is a SNF2 family DNA translocase and is a Small  
38 Ubiquitin-like modifier (SUMO) binding protein. Despite that both translocase activity and SUMO-binding  
39 activity are required for proper chromosome segregation, how these two activities function to mediate  
40 chromosome segregation remains unknown. Here, we show that PICH specifically promotes dissociation  
41 of SUMOylated TopoisomeraseII $\alpha$  (TopoII $\alpha$ ) from mitotic chromosomes. When TopoII $\alpha$  is stalled by  
42 treatment of cells with a potent TopoII inhibitor, ICRF-193, TopoII $\alpha$  becomes SUMOylated, and this  
43 promotes its interaction with PICH. Conditional depletion of PICH using the Auxin Inducible Degron (AID)  
44 system resulted in retention of SUMOylated TopoII $\alpha$  on chromosomes, indicating that PICH removes  
45 stalled SUMOylated TopoII $\alpha$  from chromosomes. *In vitro* assays showed that PICH specifically regulates  
46 SUMOylated TopoII $\alpha$  activity using its SUMO-binding and translocase activities. Taken together, we  
47 propose a novel mechanism for how PICH acts on stalled SUMOylated TopoII $\alpha$  for proper chromosome  
48 segregation.

49  
50 **Introduction**

51 Accurate chromosome segregation is a complex and highly regulated process during mitosis. Sister  
52 chromatid cohesion is necessary for proper chromosome alignment, and is mediated by both Cohesin and  
53 catenated DNA at centromeric regions (Bauer et al., 2012, Losada et al., 1998, Michaelis et al., 1997).  
54 Compared to the well-described regulation of Cohesin (Morales and Losada, 2018), the regulation of  
55 catenated DNA cleavage by DNA TopoisomeraseII $\alpha$  (TopoII $\alpha$ ) is not fully understood despite its critical  
56 role in sister chromatid disjunction. ATP-dependent DNA decatenation by TopoII $\alpha$  takes place during the  
57 metaphase-to-anaphase transition allowing for proper sister chromatid disjunction (Gomez et al., 2014,  
58 Shamu and Murray, 1992, Wang et al., 2010). Failure in resolution of catenanes by TopoII $\alpha$  leads to the  
59 formation of chromosome bridges, and ultra-fine DNA bridges (UFBs) to which PICH localizes (Spence et  
60 al., 2007). PICH is a SNF2 family DNA translocase (Baumann et al., 2007, Biebricher et al., 2013), and its  
61 binding to UFBs recruits other proteins to UFBs (Chan et al., 2007, Hengeveld et al., 2015). In addition to  
62 the role in UFB binding during anaphase, PICH has been shown to play a key role in sister chromatid  
63 disjunction in the metaphase to anaphase transition (Baumann et al., 2007, Nielsen et al., 2015, Sridharan  
64 and Azuma, 2016). These studies suggest that PICH surveys for and resolves catenanes during  
65 prometaphase to metaphase, assuring the proper segregation of sister chromatids during anaphase.

66 Recently, we demonstrated that both DNA translocase activity and SUMO-binding activity of  
67 PICH are required for chromosome segregation (Sridharan and Azuma, 2016). PICH binds SUMOylated  
68 proteins using its three SUMO interacting motifs (SIMs) (Sridharan et al., 2015). PICH utilizes ATPase  
69 activity to translocate DNA similar to known nucleosome remodeling enzymes (Whitehouse et al., 2003),  
70 thus it is a putative remodeling enzyme for chromatin proteins. Intriguingly, the nucleosome remodeling  
71 activity of PICH was shown to be limited as compared to established nucleosome remodeling factors (Ke  
72 et al., 2011). Therefore, the target of PICH remodeling activity has not yet been determined. Importantly,  
73 both loss of function PICH mutants in either SUMO-binding activity or translocase activity showed  
74 chromosome bridge formation (Sridharan and Azuma, 2016), suggesting that both of these activities  
75 cooperate to accomplish proper chromosome segregation. Previous studies demonstrated that PICH-  
76 depleted cells have increased sensitivity to ICRF-193, a potent TopoII catalytic inhibitor, accompanied with  
77 increased incidence of chromosome bridges, binucleation, and micronuclei formation (Kurasawa and Yu-  
78 Lee, 2010, Nielsen et al., 2015, Wang et al., 2008). ICRF-193 stalls TopoII $\alpha$  at the last step of the strand  
79 passage reaction (SPR) in which two DNA strands are trapped within TopoII $\alpha$  without DNA strand breaks  
80 (Patel et al., 2000, Roca et al., 1994). Therefore, ICRF-193 treatment in mitotic cells produces unresolved  
81 catenanes bound by stalled TopoII $\alpha$ . Recent studies indicate that PICH prevents this event by increasing  
82 TopoII $\alpha$  activity (Nielsen et al., 2015). However, it is unknown how PICH resolves stalled TopoII $\alpha$  in  
83 closed clamp conformation with ICRF-193 treatment. Importantly, it has been shown that ICRF-193  
84 treatment increases SUMOylation of TopoII $\alpha$  on mitotic chromosomes (Agostinho et al., 2008). This  
85 upregulation of TopoII $\alpha$  SUMOylation was not observed after treatment with another potent TopoII  
86 inhibitor, Merbarone (Agostinho et al., 2008). Merbarone prevents TopoII activity at the initial stage of its

87 SPR and in a different conformation than ICRF-193 (Fortune and Osheroff, 1998). Therefore, it does not  
88 result in stalled TopoII on DNA. This distinction between TopoII inhibitors suggests that SUMOylation of  
89 TopoII $\alpha$  represents the stalled TopoII $\alpha$  on DNA. These observations lead to the hypothesis that PICH  
90 interacts with SUMOylated TopoII $\alpha$  and prevents the formation of chromosome bridges by resolving stalled  
91 TopoII $\alpha$ -mediated catenanes.

92 Our results demonstrate that TopoII $\alpha$  is SUMOylated upon stalling by ICRF-193 treatment,  
93 leading to recruitment of PICH to SUMOylated TopoII $\alpha$ . Depletion of PICH retained more SUMOylated  
94 TopoII $\alpha$  on the chromosomes in ICRF-193 treated cells. This suggests that PICH is required for removing  
95 stalled SUMOylated TopoII $\alpha$  from chromosomes. *In vitro* assays suggest that PICH controls SUMOylated  
96 TopoII $\alpha$  activity in both a translocase and SUMO-binding dependent manner. Together, we propose a novel  
97 mechanism for PICH in promoting proper chromosome segregation in mitosis by removing stalled  
98 SUMOylated TopoII $\alpha$  from mitotic chromosomes.

99

## 100 Results

101

### 102 PICH, SUMO2/3, and TopoII $\alpha$ colocalize on mitotic chromosomes upon TopoII $\alpha$ inhibition by ICRF- 103 193.

104 Treatment with ICRF-193, a catalytic inhibitor of TopoII which blocks TopoII at the last stage of its  
105 SPR, after DNA decatenation but before DNA release, increases SUMO2/3 modification of TopoII $\alpha$  on  
106 mitotic chromosomes. In contrast, treatment with another catalytic TopoII inhibitor, Merbarone, which  
107 blocks TopoII before the cleavage step of the SPR, does not affect the level of SUMO2/3 modification of  
108 TopoII $\alpha$  (Agostinho et al., 2008). We utilized these two contrasting inhibitors to assess whether TopoII $\alpha$   
109 inhibition and/or SUMOylation changes PICH distribution on mitotic chromosomes. HCT116 cells were  
110 synchronized in prometaphase, and mitotic cells were isolated by shake off. To assess the effects of the  
111 TopoII inhibitors specifically during mitosis, the inhibitors were added to the cells after mitotic shake off.  
112 Consistent with previous reports (Agostinho et al., 2008), Western blotting analysis of isolated  
113 chromosomes showed that treatment with ICRF-193 increased the overall SUMO2/3 modification of  
114 chromosomal proteins. There were upshifted bands detected by anti-TopoII $\alpha$  antibody, which indicate that  
115 the ICRF-193 treatment increased the level of SUMOylated TopoII $\alpha$  on chromosomes (marked by red  
116 asterisks in Figure 1A). In contrast, Merbarone did not induce apparent differences in either the overall  
117 SUMO2/3 modification of chromosomal proteins or the TopoII $\alpha$  SUMOylation, suggesting the specificity  
118 of ICRF-193 on the SUMOylation of TopoII $\alpha$  (Figure 1A).

119 Immunofluorescent analysis of cells treated with ICRF-193 or Merbarone showed SUMO 2/3 foci at  
120 the centromere consistent with previous studies (Azuma et al., 2005; Zhang et al., 2008). However, in ICRF-  
121 193 treated cells there was an increase in SUMO2/3 foci intensity as compared to cells treated with DMSO  
122 or Merbarone (Figure 1B). Similar to previous reports, PICH foci were observed at the centromere  
123 (Baumann et al., 2007, Sridharan and Azuma, 2016). Again, PICH foci intensity was increased in cells  
124 treated with ICRF-193. Then, the colocalization of PICH and SUMO2/3 was measured in the entire cell.  
125 The incidence of colocalization between PICH and SUMO2/3 signals in the ICRF-193 treated cells was  
126 significantly higher (72% on average) than DMSO treated cells (42% on average) (Figure 1B middle row,  
127 C). In contrast, the incidence of colocalization between SUMO2/3 and PICH in the Merbarone treated cells  
128 did not show any significant changes compared to DMSO treated cells (Figure 1B bottom row, C).

129 Because our previous study showed that PICH binds to SUMOylated TopoII $\alpha$  C-terminal domain  
130 (Sridharan et al., 2015), we anticipated that the increased incidence of colocalization between SUMO2/3  
131 and PICH is due to the interaction between these two molecules. When cells were treated with ICRF-193,  
132 the incidence of colocalization between PICH and TopoII $\alpha$  at the centromere was significantly higher than  
133 the DMSO treated cells (Figure 1D, E). In contrast, Merbarone treatment did not show any significant  
134 differences as compared to DMSO treated cells (Figure 1D, E). This suggests that ICRF-193 mediated  
135 SUMOylation promotes a redistribution of PICH resulting in both PICH/TopoII $\alpha$  and PICH/SUMO2/3  
136 colocalization at centromeric regions. Because the colocalization between PICH/SUMO2/3 and  
137 PICH/TopoII $\alpha$  is induced by ICRF-193 but not by Merbarone, the colocalization of these proteins is

138 triggered by the hyper-accumulation of SUMOylated proteins at the centromere but not by inhibition of  
139 TopoII $\alpha$  activity.

140

### 141 **SUMOylated TopoII $\alpha$ is a critical binding target of PICH in ICRF-193 treated cells.**

142 To determine if SUMOylated TopoII $\alpha$  is the target of PICH in ICRF-193 treated cells, we examined  
143 whether TopoII $\alpha$  depletion ( $\Delta$ TopoII $\alpha$ ) affects PICH/SUMO2/3 colocalization. To deplete TopoII $\alpha$  from  
144 cells, we created a conditional TopoII $\alpha$ -knockdown cell line which utilizes the Auxin-Inducible Degrone  
145 (AID) system (Natsume et al., 2016, Nishimura et al., 2009) (Supplemental Figure S1 and S2). We inserted  
146 DNA encoding an AID-Flag tag into the TopoII $\alpha$  locus (Supplemental Figure S2A, B, and C) to a cell line  
147 that has verified integration of the *OsTIR1* gene, an auxin-dependent Ubiquitin E3 ligase, in the genome  
148 (Supplemental Figure S1). After auxin addition AID-tagged TopoII $\alpha$  was degraded to undetectable levels  
149 within 6 hours. (Supplemental Figure S2D). This rapid elimination allows us to examine the effect of  
150 TopoII $\alpha$  depletion in a single cell cycle. In  $\Delta$ TopoII $\alpha$  ICRF-193 treated cells, there was an extreme  
151 reduction of SUMO2/3 and PICH signals at centromeres (marked by CENP-C) (Figure 2A). In addition,  
152 the incidence of colocalization between PICH/SUMO2/3 at the centromere was also significantly reduced  
153 in  $\Delta$ TopoII $\alpha$  ICRF-193-treated cells (Figure 2B comparing red and purple characters). This suggests that  
154 PICH is recruited to SUMOylated TopoII $\alpha$  in the presence of ICRF-193. Consistently, the Western blotting  
155 analysis using isolated mitotic chromosomes obtained from  $\Delta$ TopoII $\alpha$  ICRF-193-treated cells showed  
156 slightly decreased SUMO2/3 modification and reduced level of PICH compared to control cells treated  
157 with ICRF-193 (Figure 2C +Auxin/ICRF lane). Although, because the levels of SUMO2/3 modification  
158 were still increased as compared to DMSO treated control cells, that may represent, in part, SUMOylation  
159 of TopoII $\beta$ . TopoII $\beta$  has been shown to have increased SUMOylation under ICRF-193 treatment (Isik  
160 et al., 2003, Mao et al., 2000). Because PICH/SUMO2/3 colocalization is decreased to control levels  
161 when TopoII $\alpha$  is depleted, TopoII $\beta$  is clearly not the target to which PICH interacts. Together, the  
162 results show PICH targets SUMOylated TopoII $\alpha$  at centromeres under ICRF-193 treatment.

163

### 164 **SUMOylation is required for PICH/TopoII $\alpha$ colocalization at the centromere**

165 The increased PICH localization to centromeres in ICRF-193 treated cells is likely due to TopoII $\alpha$   
166 SUMOylation. To determine whether SUMOylation is required for PICH localization to mitotic  
167 centromeres, we established cell lines to attenuate the level of SUMOylation at the centromere. To  
168 accomplish this, we generated a fusion protein, called Py-S2, which consists of the SENP2-catalytic domain  
169 (required for deSUMOylation) (Reverter and Lima, 2004, Ryu et al., 2015, Sridharan et al., 2015), and of  
170 the N-terminal region of human PIASy (localizes to mitotic centromeres through its specific binding with  
171 the RZZ complex at the kinetochore) (Ryu and Azuma, 2010)). As a negative control, we substituted a  
172 cysteine at the position 548 of SENP2 to an alanine (called Py-S2 Mut) to create a loss of function mutant  
173 of the SENP2 deSUMOylation activity (Reverter and Lima, 2004, Reverter and Lima, 2006) (Figure 3A).  
174 The activity of the recombinant fusion proteins was verified by *Xenopus* egg extract (XEE) assay  
175 (Supplemental Figure S3). As we predicted, addition of the Py-S2 protein to XEE completely eliminates  
176 mitotic chromosomal SUMOylation. To our surprise, Py-S2 Mut protein stabilized the SUMOylation of  
177 chromosomal proteins, thus acted as a dominant negative mutant. To express the fusion proteins in cells,  
178 we created inducible expression cell lines using the Tetracycline inducible system (Supplemental Figure  
179 S4). We integrated each of the fusion genes into the AAVS1 safe harbor locus of HCT116 cells using  
180 integration plasmids (Natsume et al., 2016).

181 To test the effect of attenuated SUMOylation during mitosis, cells were synchronized with or without  
182 doxycycline treatment, and chromosomes were isolated. Western blotting of mitotic chromosomal fractions  
183 showed that expression of Py-S2 attenuated the SUMO2/3 modification on mitotic chromosomes. The  
184 attenuation of mitotic SUMO2/3 modification by Py-S2 became apparent in the ICRF-193 treated samples  
185 (Figure 3B comparing -/+Dox with ICRF-193). Consistent with the SUMO2/3 modification profile, Py-S2  
186 expression substantially attenuated SUMOylated TopoII $\alpha$  in ICRF-193 treated cells (Figure 3B comparing  
187 -/+Dox samples with ICRF-193). Notably, the amount of PICH on chromosomes in the ICRF-193 treated  
188 sample was reduced when SUMOylation was attenuated by Py-S2 (Figure 3B comparing -/+Dox samples

189 with ICRF-193). Distinct from the result that displayed complete elimination of SUMO2/3 modification in  
190 XEE assays (Supplemental Figure S3A), the SUMO2/3 and SUMOylated TopoII $\alpha$  signals were still present  
191 in the Py-S2 expressing cells. This is likely due to the mosaic expression of Py-S2 represented by SUMO2/3  
192 signals (Figure 3C). The SUMO2/3 signals in Py-S2 expressing cells displayed either retention of  
193 SUMO2/3 signals on chromosomes suggesting no transgene expression (hereafter referred to as SUMO  
194 positive cells), or no SUMO2/3 signal on chromosomes suggesting transgene expression (hereafter referred  
195 to as SUMO negative cells) (Figure 3C). PICH signals in the SUMO positive cells displayed strong  
196 centromeric foci, resembling that of ICRF-193-treated parental HCT116 cells (Figure 1B). In SUMO  
197 negative cells, the intensity of PICH foci was lessened and a more diffuse non-centromeric signal was  
198 observed. Consistent with our observations in XEE assays, TopoII $\alpha$  signal did not show apparent  
199 differences between SUMO positive cells and negative cells, suggesting that inhibition of mitotic  
200 SUMOylation does not affect TopoII $\alpha$  association with chromosomes (Azuma et al., 2005, Azuma et al.,  
201 2003). Colocalization between PICH and TopoII $\alpha$  foci was reduced in SUMO negative cells (indicated by  
202 the magnified image in the merged panel in Figure 3C). The incidence of PICH/TopoII $\alpha$  colocalization in  
203 the SUMO negative/ICRF-193 treated cells was comparable to DMSO treated cells (Figure 3D comparing  
204 blue and purple characters), indicating that mitotic SUMOylation is indispensable for the ICRF-193 effect  
205 on PICH/TopoII $\alpha$  colocalization. In SUMO positive cells, ICRF-193 treatment showed similar  
206 PICH/TopoII $\alpha$  colocalization to parental HCT116 cells (comparing Figure 3D blue and red characters to  
207 those in Figure 1E). This strongly suggests that SUMOylation of TopoII $\alpha$  is required for ICRF-193 induced  
208 PICH/TopoII $\alpha$  colocalization.

209 Consistent with the result obtained from XEE assay (Supplemental Figure S3), Western blotting of the  
210 mitotic chromosome fraction showed that Py-S2 Mut expression in the HCT116 increased both overall  
211 SUMO2/3 modification and TopoII $\alpha$  SUMOylation (Figure 4A +Dox samples). In addition, the amount of  
212 PICH on chromosomes was also increased in the Py-S2 Mut expressing cells (Figure 4A comparing -/+Dox  
213 samples). The immunostaining of Py-S2 Mut expressing cells revealed increased intensity of PICH foci as  
214 compared to uninduced cells treated with DMSO (Figure 4B DMSO -/+Dox). ICRF-193 treated Py-S2 Mut  
215 expressing cells showed a large amplification of PICH signal (Figure 4B ICRF -/+Dox). Importantly, the  
216 cells expressing the Py-S2 Mut showed a significant increase in PICH/TopoII $\alpha$  colocalization independent  
217 of ICRF-193 treatment (Figure 4C comparing +Dox with DMSO or ICRF-193, blue and red boxes).  
218 Indicating that ICRF-193 treatment with Py-S2 Mut expression did not show a synergistic effect on  
219 PICH/TopoII $\alpha$  colocalization (Figure 4C -/+ Dox with ICRF-193, red boxes). This suggests that increased  
220 chromosomal SUMOylation, presumably TopoII $\alpha$  SUMOylation, is the major cause of ICRF-193 mediated  
221 PICH/TopoII $\alpha$  colocalization on mitotic chromosomes. Together, these results further strengthen the  
222 concept that PICH specifically targets SUMOylated TopoII $\alpha$  under ICRF-193 treatment.

223

#### 224 **PICH controls the association of SUMOylated TopoII $\alpha$ with chromosomes at the centromere.**

225 Our results suggest that PICH interacts with SUMOylated TopoII $\alpha$  on mitotic chromosomes in ICRF-  
226 193 treated cells. To examine the biological function of PICH targeting SUMOylated TopoII $\alpha$ , we  
227 generated a conditional PICH-knockdown cell using the AID system. DNA encoding an AID-Flag tag was  
228 introduced at the PICH locus (Supplemental Figure S5A, B, and C) into the OsTIR1-expressing stable cell  
229 line. Western blotting analysis confirmed that after auxin treatment AID-tagged PICH can be degraded to  
230 undetectable levels within 4 hours (Supplemental Figure S5D). To examine the effect of PICH depletion  
231 ( $\Delta$ PICH) on SUMOylated TopoII $\alpha$ , cells were synchronized in mitosis and chromosomes were isolated.  
232 Western blotting analysis of mitotic chromosomes showed that treatment with ICRF-193 increases the  
233 amount of PICH (Figure 5A -Auxin DMSO/ICRF lanes). This is consistent with results from native PICH  
234 expressing cells (Figure 2C, 3B, and 4B), suggesting that tagging PICH with the AID did not alter its  
235 response to ICRF-193 treatment. With the addition of auxin, there was no detectable PICH remaining on  
236 mitotic chromosomes (Figure 5A +Auxin DMSO/ICRF lanes). Importantly, PICH-depletion did not affect  
237 the amount of non-SUMOylated TopoII $\alpha$  (Figure 5B +Auxin  $\Delta$ PICH) but retained significantly higher  
238 levels of SUMOylated TopoII $\alpha$  on mitotic chromosomes when the cells were treated with ICRF-193 (Figure  
239 5C +Auxin  $\Delta$ PICH). This suggests that PICH attenuates the interaction of SUMOylated TopoII $\alpha$  with

240 chromosomes. The function of PICH is amplified by the treatment of cells with ICRF-193, presumably due  
241 to increased levels of SUMOylated TopoII $\alpha$ .

242 Consistent with Western blotting analysis, immunostaining of auxin treated cells showed no PICH  
243 signal on mitotic chromosomes in both DMSO and ICRF-193 treated cells (Supplemental Figure 6A  
244 +Auxin  $\Delta$ PICH). The elimination of PICH foci on mitotic chromosomes was observed in all of the analyzed  
245 cells. There was no difference in TopoII $\alpha$  localization in DMSO-treated cells with or without PICH, both  
246 showing diffuse signals on chromosomes with enrichment at the centromeres. This suggests that  $\Delta$ PICH  
247 does not affect global TopoII $\alpha$  localization in this analysis (Figure 5D comparing top row and third row).  
248 With ICRF-193 treatment, both PICH-nondepleted and  $\Delta$ PICH cells showed further enrichment of TopoII $\alpha$   
249 foci at the centromere (Figure 5D comparing second row and bottom row). But there was less diffuse  
250 TopoII $\alpha$  signal in  $\Delta$ PICH cells treated with ICRF-193. The intensities of SUMO2/3 foci at centromeres  
251 were clearly increased in  $\Delta$ PICH cells treated with ICRF-193 (Figure 5D bottom row). The quantification  
252 of centromeric SUMO2/3 foci indicated a statistically significant increase in the  $\Delta$ PICH treated with ICRF-  
253 193 (Figure 5E). Because centromeric SUMO2/3 signal in ICRF-193 treated  $\Delta$ TopoII $\alpha$  cells was  
254 diminished (Figure 2A) and  $\Delta$ PICH increased retention of SUMOylated TopoII $\alpha$  on chromosomes (Figure  
255 5C), the increased centromeric SUMO2/3 foci in  $\Delta$ PICH ICRF-193 treated cells likely represent  
256 SUMOylated TopoII $\alpha$  molecules. Together, these data indicate that PICH functions to remove stalled  
257 SUMOylated TopoII $\alpha$  from mitotic centromeres in ICRF-193 treated cells.

### 258 259 **Regulation of SUMOylated TopoII $\alpha$ activity is dependent on both PICH ATPase activity and SIMs** 260 ***in vitro*.**

261 Results from PICH-depleted cells suggest that PICH removes stalled SUMOylated TopoII $\alpha$  induced by  
262 ICRF-193 from chromosomes. This activity may utilize both translocase activity of PICH and SUMO-  
263 binding activity to promote dissociation of SUMOylated TopoII $\alpha$  from chromosomes. To examine if PICH  
264 SUMO-binding activity and translocase activity are important in controlling SUMOylated TopoII $\alpha$  binding  
265 to DNA, we performed an *in vitro* DNA decatenation assay comparing non-SUMOylated and SUMOylated  
266 TopoII $\alpha$  (Figure 6A) in the presence of PICH. Using the same conditions established in our previous study,  
267 recombinant *Xenopus laevis* TopoII $\alpha$  was SUMOylated *in vitro*, then its DNA decatenation activity was  
268 analyzed by using catenated kDNA as the substrate (Ryu et al., 2010b). The decatenation activity was  
269 measured by calculating the percentage of decatenated kDNA separated by gel electrophoresis. On average,  
270 70% of kDNA is decatenated at the ten-minute time-point when non-SUMOylated TopoII $\alpha$  is present in  
271 the reaction (Figure 6B PICH — and SUMO — lanes). As we have previously shown, the decatenation  
272 activity of SUMOylated TopoII $\alpha$  was reduced compared to non-SUMOylated TopoII $\alpha$ . Importantly, when  
273 we added PICH to each of the reaction at concentrations equimolar to TopoII $\alpha$ , the decatenation activity of  
274 SUMOylated TopoII $\alpha$  was further attenuated (Figure 6B, C). The reduction of decatenation activity of  
275 SUMOylated TopoII $\alpha$  was statistically significant at both the five minute and ten-minute time-points  
276 (Figure 6C light grey bars). Consistent with recent reports, the addition of PICH slightly increased  
277 decatenation activity of non-SUMOylated TopoII $\alpha$  (Nielsen et al., 2015). A dose-dependent effect of PICH  
278 on SUMOylated TopoII $\alpha$  decatenation activity was observed but that was not the case for non-SUMOylated  
279 TopoII $\alpha$ . The concentration of TopoII $\alpha$  in the reaction was 200nM, and PICH significantly reduced  
280 decatenation activity of SUMOylated TopoII $\alpha$  ranging between 250nM up to 400nM (Figure 6D, E). Only  
281 SUMOylated TopoII $\alpha$  was inhibited by PICH dose-dependently which is distinct from the PICH/non-  
282 SUMOylated TopoII $\alpha$  interaction.

283 Because the translocase activity of PICH removes proteins from DNA, PICH inhibits decatenation  
284 activity of SUMOylated TopoII $\alpha$  by removing SUMOylated TopoII $\alpha$  from kDNA. To gain insight into that  
285 potential mechanism, we utilized a PICH mutant that has defects in either the SUMO-binding activity  
286 (PICH-d3SIM) or in translocase activity (PICH-K128A) (Figure 7A) (Sridharan et al., 2016). If  
287 PICH/SUMO interaction is critical for inhibiting decatenation activity of SUMOylated TopoII $\alpha$ , the PICH-  
288 d3SIM mutant would lose its inhibitory function. In addition, we also expect that the PICH translocase  
289 activity deficient (PICH-K128A) mutant loses the ability to inhibit the decatenation activity of SUMOylated  
290 TopoII $\alpha$ , because the mutant could not remove SUMOylated TopoII $\alpha$  from kDNA. Supporting our

291 hypothesis, PICH-d3SIM inhibited SUMOylated TopoII $\alpha$  decatenation activity substantially less than wild-  
292 type (Figure 7B, C), suggesting that the direct SUMO/SIM interactions between PICH and SUMOylated  
293 TopoII $\alpha$  plays a key role in this inhibition. Intriguingly, the translocase deficient PICH mutant further  
294 suppressed the SUMOylated TopoII $\alpha$  decatenation activity (Figure 7B, D). This suggests that the  
295 translocase deficient mutant forms a stable complex with SUMOylated TopoII $\alpha$  and the catenated kDNA  
296 because the translocase mutant retains its DNA binding ability (Kaulich et al., 2012, Nielsen et al., 2015,  
297 Sridharan and Azuma, 2016). Notably, neither mutant showed any significant effect on non-SUMOylated  
298 TopoII $\alpha$  (Figure 7B) similar to wild-type PICH. This suggests that PICH binding to DNA does not inhibit  
299 the decatenation activity of TopoII $\alpha$ , but rather it forms a complex with SUMOylated TopoII $\alpha$  and prevents  
300 its decatenation activity. Taken together, our results suggest that PICH recognizes the SUMO moieties on  
301 TopoII $\alpha$  through its SIMs and removes SUMOylated TopoII $\alpha$  from DNAs using its translocase activity.

302 In conclusion, our results show that PICH targets SUMOylated TopoII $\alpha$  to attenuate its interaction with  
303 chromosomes. When SUMOylation of TopoII $\alpha$  is enhanced by its inhibitor, ICRF-193, the activity of PICH  
304 to remove SUMOylated TopoII $\alpha$  from DNA becomes more prominent. Because ICRF-193 promotes  
305 trapped TopoII $\alpha$  on DNA at the last stage of its SPR in a closed clamp conformation, we propose a model  
306 showing how PICH resolves detangled but trapped DNA that are bound within SUMOylated TopoII $\alpha$  in  
307 both unperturbed and ICRF-193 affected mitosis (Figure 8).

308

## 309 Discussion

310 The identification of PICH led to the discovery of UFBs which represent the existence of tangled DNA  
311 during mitosis (Biebricher et al., 2013, Wang et al., 2008). The importance of TopoII $\alpha$  in resolving UFBs  
312 is highlighted by a study showing an increased incidence of PICH-positive UFBs in TopoII $\alpha$ -knockdown  
313 cells (Spence et al., 2007). Likewise, knocking out PICH sensitizes cells to ICRF-193 treatment, suggesting  
314 that PICH plays a role in resolving stalled TopoII $\alpha$  mediated UFB formation (Kurasawa and Yu-Lee, 2010,  
315 Nielsen et al., 2015). The current model indicates that the requirement of PICH in ICRF-193 treated cells  
316 is due to the necessity of PICH to increase TopoII $\alpha$  decatenation activity. (Nielsen et al., 2015). However,  
317 ICRF-193 causes TopoII to stall at the last stage of the SPR when two DNA strands are held within TopoII.  
318 Thus, increasing the activity of TopoII $\alpha$  by PICH does not entirely explain how this would lead to the  
319 resolution of stalled TopoII $\alpha$ . Therefore, we propose an advanced model showing how PICH directly  
320 removes stalled SUMOylated TopoII $\alpha$  from chromosomes in the presence of ICRF-193 (Figure 8). This  
321 model is supported by conditional knockdown of PICH that showed increased retention of SUMOylated  
322 TopoII $\alpha$  on mitotic chromosomes (Figure 4). By treating the  $\Delta$ PICH cells with ICRF-193, the retention of  
323 SUMOylated TopoII $\alpha$  became more significant, supporting the specific role of PICH in removing stalled  
324 SUMOylated TopoII $\alpha$ . *In vitro* assays further support that PICH utilizes its SIMs and its translocase activity  
325 to attenuate SUMOylated TopoII $\alpha$  decatenation activity (Figure 7C, D). ICRF-193 stalls TopoII $\alpha$  in a  
326 closed clamp conformation with two DNA strands are bound within it, and this structure is particularly  
327 susceptible to SUMOylation. PICH then binds SUMOylated TopoII $\alpha$  utilizing its SIMs and removes it from  
328 its stalled position using its translocase activity, resulting in the release of two resolved DNA strands held  
329 by stalled TopoII $\alpha$  (Figure 8). The process of removing stalled SUMOylated TopoII $\alpha$  from decatenated,  
330 but not released DNA, resolves chromosome bridges which were originally shown to be upregulated in the  
331 PICH knockout/knockdown experiments (Kurasawa and Yu-Lee, 2010, Nielsen et al., 2015).

332 One remaining question is how SUMOylated TopoII $\alpha$  becomes a critical target of PICH among all of  
333 the SUMOylated chromosomal proteins in the ICRF-193 treated cells. Our *in vitro* assays and previous  
334 reports showed that PICH interacts with TopoII $\alpha$  and affects TopoII $\alpha$  activity (Nielsen et al., 2015). This  
335 suggests that PICH has a binding affinity for TopoII $\alpha$  regardless of its modification status, thus due to this  
336 intrinsic binding affinity PICH preferentially binds SUMOylated TopoII $\alpha$  over other SUMOylated proteins.  
337 Another possibility is the contribution of other posttranslational modifications on TopoII $\alpha$  that are  
338 influenced by ICRF-193 treatment. TopoII $\alpha$  is known to be phosphorylated at its C-terminal domain with  
339 ICRF-193 treatment in mammalian cells and fission yeast (Luo et al., 2009, Nakazawa et al., 2019). The  
340 phosphorylation is suggested to play a critical role in a TopoII-dependent cell cycle checkpoint. We  
341 demonstrated that SUMOylation of TopoII $\alpha$  promotes binding with Claspin (Ryu et al., 2015) which is an

342 upstream regulator of Chk1 (Kumagai and Dunphy, 2003), and Haspin (Yoshida et al., 2016) the kinase  
343 responsible for phosphorylating H3T3 (Dai et al., 2005). In the future, it is essential to study whether kinases  
344 bound to SUMOylated TopoII $\alpha$  affect the phosphorylation of TopoII $\alpha$  and the activity of PICH for  
345 removing SUMOylated TopoII $\alpha$  from chromosomes.

346 Although SUMOylated TopoII $\alpha$  is a critical target of PICH in the ICRF-193 treated cells, PICH also  
347 interacts with other SUMOylated proteins and may control their binding to chromosomes. This is supported  
348 by our results which show retention of other SUMO2/3 modified proteins on mitotic chromosomes in  
349  $\Delta$ PICH cells (Supplemental Figure 6B +Auxin lane). We previously showed that PICH interacts with  
350 SUMOylated PARP1 as well as a tetrameric SUMO chain, suggesting that PICH promiscuously binds  
351 SUMOylated proteins (Sridharan et al., 2015). Both loss of translocase activity and SUMO-binding activity  
352 of PICH leads to chromosome bridge formation (Sridharan and Azuma, 2016) which could derive from the  
353 increased incidence of UFBs due to stalled SUMOylated TopoII $\alpha$ . However, other SUMO2/3 modified  
354 chromosomal proteins remodeled by PICH might contribute to chromosome bridge formation in loss of  
355 PICH cells (Baumann et al., 2007, Kurasawa and Yu-Lee, 2010, Nielsen et al., 2015). Supporting this idea,  
356 it has been shown that defects in the regulation of mitotic SUMOylation causes similar chromosome bridge  
357 formation. For example, loss of a SUMO E3 ligase showed mitotic defects and chromosome bridge  
358 formation in *Drosophila* (Hari et al., 2001). Also, defects in deSUMOylation enzymes induce defective  
359 mitosis with chromosome bridge formation in cultured cells (Cubenas-Potts et al., 2013, Mukhopadhyay et  
360 al., 2010, Zhang et al., 2008). Several potential key SUMOylated chromosomal proteins were proposed to  
361 explain this SUMOylation-dependent defect (Myatt et al., 2014, Schimmel et al., 2014, Zhang et al., 2008).  
362 Once we identify which SUMOylated chromosomal proteins are controlled by PICH, and characterize their  
363 abundance on chromosomes, we will be able to elucidate the role of PICH as a “SUMOylated chromosomal  
364 protein remodeler” and its comprehensive function in chromosome segregation.

## 365 **Materials and Methods**

### 366 **Plasmids, constructs, and site-directed mutagenesis**

367 The Py-S2 fusion DNA construct of human PIASy-NTD (amino acid 1-135) and SENP2-CD (amino acid  
368 363-589) was created by fusion PCR method using a GA linker between the two fragments. Then, the Py-  
369 S2 fusion DNA fragment was subcloned into a recombinant expression pET28a plasmid at the BamHI/XhoI  
370 sites. To generate the Py-S2 Mut fusion DNA construct, substitution of Cysteine to Alanine at 548 in Py-  
371 S2 was introduced using a site-directed mutagenesis QuikChangeII kit (Agilent) by following the  
372 manufacturer’s instructions. AAVS1 locus targeting donor plasmids for inducible expression of Py-S2  
373 proteins were created by modifying pMK243 (Tet-OsTIR1-PURO) plasmid (Natsume et al., 2016).  
374 pMK243 (Tet-OsTIR1-PURO) was purchased from Addgene (#72835) and the OsTIR1 fragment was  
375 removed by BglII and MluI digestion, followed by an insertion of a multi-cloning site. The Py-S2 fragments  
376 were inserted at the MluI and SalI sites of the modified pMK243 plasmid. The original plasmid for OsTIR1  
377 targeting to RCC1 locus was created by inserting the TIR1 sequence amplified from pBABE TIR1-9Myc  
378 (Addgene #47328; (Holland et al., 2012) plasmid, Blastocidin resistant gene (BSD) amplified from pQCXIB  
379 with ires-blast (Takara/Clontech), and miRFP670 amplified from pmiRFP670-N1 plasmid (Addgene  
380 #79987; (Shcherbakova et al., 2016) into the pEGFP-N1 vector (Takara/Clontech) with homology arms for  
381 RCC1 C-terminal locus. Using genomic DNA obtained from DLD-1 cell as a template DNA, the homology  
382 arms were amplified using primers listed in supplemental information (Supporting information Table 1).  
383 Further, OsTIR1 targeting plasmid was modified by eliminating the miRFP670 sequence by PCR  
384 amplification of left homology arm and TIR/BSD/right homology arm for inserting into pMK292 obtained  
385 from Addgene (#72830) (Natsume et al., 2016) using XmaI/BstBI sites. Three copies of codon optimized  
386 micro AID tag (50 amino-acid each (Morawska and Ulrich, 2013)) was synthesized by the IDT company,  
387 and hygromycin resistant gene/ P2A sequence was inserted upstream of the 3x micro AID sequence. The  
388 3xFlag sequence from p3xFLAG-CMV-7.1 plasmid (Sigma) was inserted downstream of the AID  
389 sequence. The homology arms sequences for PICH N-terminal insertion and TopoII $\alpha$  N-terminal insertion  
390 were amplified using primers listed in supplemental information (Table S1) from genomic DNA of DLD-  
391 1 cell, then inserted into the plasmid by using PciI/SalI and SpeI/NotI sites. In all of RCC1 locus, PICH



393 locus, and TopoII $\alpha$  locus genome editing cases, the guide RNA sequences listed in supplemental  
394 information (Table S1) were designed using CRISPR Design Tools from  
395 [https://figshare.com/articles/CRISPR\\_Design\\_Tool/1117899](https://figshare.com/articles/CRISPR_Design_Tool/1117899) (Rafael Casellas laboratory, NIH) and  
396 <http://crispr.mit.edu:8079> (Zhang laboratory, MIT) inserted into pX330 (Addgene #42230) vector using the  
397 Zhang Lab General Cloning Protocol (Cong et al., 2013). Guide plasmid for targeting AAVS1 locus  
398 (AAVS1 T2 CRIPR in pX330) was obtained from Addgene (#72833) (Natsume et al., 2016). Mutations  
399 were introduced in PAM sequences on the homology arms. The *X. laevis* TopoII $\alpha$  cDNA and human PICH  
400 cDNA were subcloned into a pPIC 3.5K vector in which calmodulin-binding protein CBP-T7 tag sequences  
401 were inserted as previously described (Ryu et al., 2010b, Sridharan and Azuma, 2016). All mutations in  
402 the plasmids were generated by site-directed mutagenesis using a QuikChangeII kit (Agilent) according to  
403 manufacturer's instructions. All constructs were verified by DNA sequencing.  
404

### 405 **Recombinant protein expression and purification, and preparation of antibodies**

406 Recombinant TopoII $\alpha$  and PICH proteins were prepared as previously described (Ryu et al., 2010b,  
407 Sridharan and Azuma, 2016). In brief, the pPIC 3.5K plasmids carrying TopoII $\alpha$  or PICH cDNA fused  
408 with Calmodulin binding protein-tag were transformed into the GS115 strain of *Pichia pastoris* yeast and  
409 expressed by following the manufacturer's instructions (Thermo/Fisher). Yeast cells expressing  
410 recombinant proteins were frozen and ground with coffee grinder that contain dry ice, suspended with lysis  
411 buffer (50 mM Tris-HCl, pH 7.5, 150 mM NaCl, 2 mM CaCl<sub>2</sub>, 1 mM MgCl<sub>2</sub>, 0.1% Triton X-100, 5%  
412 glycerol, 1 mM DTT, complete EDTA-free Protease inhibitor tablet (Roche), and 10 mM PMSF). The lysed  
413 samples were centrifuged at 25,000 g for 40 min. To capture the CBP-tagged proteins, the supernatant was  
414 mixed with calmodulin-sepharose resin (GE Healthcare) for 90 min at 4°C. The resin was then washed with  
415 lysis buffer, and proteins were eluted with buffer containing 10 mM EGTA. In the case of PICH, the elution  
416 was concentrated by centrifugal concentrator (Amicon ultra with a 100kDa molecular weight cut-off). In  
417 the case of TopoII $\alpha$ , the elution was further purified by Hi-trap Q anion-exchange chromatography (GE  
418 Healthcare). Recombinant Py-S2 proteins fused to hexa-histidine tag were expressed in Rossetta2 (DE3)  
419 (EMD Millipore/Novagen) and purified with hexa-histidine affinity resin (Talon beads from  
420 Takara/Clontech). Fractions by imidazole-elution were subjected to Hi-trap SP cation-exchange  
421 chromatography. The peak fractions were pooled then concentrated by centrifugal concentrator (Amicon  
422 ultra with a 30kDa molecular weight cut-off). The E1 complex (Aos1/Uba2 heterodimer), PIASy, Ubc9,  
423 dnUbc9, and SUMO paralogues were expressed in Rosetta2(DE3) and purified as described previously  
424 (Ryu et al., 2010a).

425 To generate the antibody for human PICH, the 3' end (coding for amino acids 947~1250) was amplified  
426 from PICH cDNA by PCR. The amplified fragment was subcloned into pET28a vector (EMD  
427 Millipore/Novagen) then the sequence was verified by DNA sequencing. The recombinant protein was  
428 expressed in Rossetta2(DE3) strain (EMD Millipore/Novagen). Expressed fragment was found in inclusion  
429 body thus the proteins were solubilized by 8M urea containing buffer (20mM Hepes pH7.8, 300mM NaCl,  
430 1mM MgCl<sub>2</sub>, 0.5mM TCEP). The solubilized fragment was purified by Talon-resin (Clontech/Takara)  
431 using the hexa-histidine-tag fused at the N-terminus of the fragment. The purified fragment was separated  
432 by SDS-PAGE and protein was excised after InstantBlue™ (Sigma-Aldrich) staining. The gel slice was  
433 used as an antigen and immunization of rabbits was made by Pacific Immunology Inc., CA, USA. To  
434 generate the primary antibody for human TopoII $\alpha$ , the 3' end of TopoII $\alpha$  (coding for amino acids  
435 1359~1589) was amplified from TopoII $\alpha$  cDNA by PCR. The amplified fragment was subcloned into  
436 pET28a and pGEX-4T vectors (GE Healthcare) then the sequence was verified by DNA sequencing. The  
437 recombinant protein was expressed in Rossetta2(DE3). The expressed peptide was purified using hexa-  
438 histidine-tag and GST-tag by Talon-resin (Clontech/Takara) or Glutathione-sepharose (GE healthcare)  
439 following the manufacture's protocol. The purified peptides were further separated by cation-exchange  
440 column. Purified hexa-histidine-tagged TopoII $\alpha$  peptide as used as an antigen and immunization of rabbits  
441 was made by Pacific Immunology Inc., CA, USA. For both PICH and TopoII $\alpha$  antigens, antigen affinity  
442 columns were prepared by conjugating purified antigens (hexa-histidine-tagged PICH C-terminus fragment  
443 or GST-tagged TopoII $\alpha$  C-terminus fragment) to the NHS-Sepharose resin following manufacture's

444 protocol (GE healthcare). The rabbit antisera were subjected to affinity purification using antigen affinity  
445 columns. Secondary antibodies used for this study and their dilution rates were: for Western blotting; Goat  
446 anti-Rabbit (IRDye®680RD, 1/20000, LI-COR) and Goat anti-Mouse (IRDye®800CW, 1/20000, LI-COR),  
447 and for immunofluorescence staining; Goat anti-mouse IgG Alexa Fluor 568 (#A11031, 1:500, Invitrogen),  
448 goat anti-rabbit IgG Alexa Fluor 568 (#A11036, 1:500, Invitrogen), goat anti-rabbit IgG Alexa Fluor 488  
449 (#A11034, 1:500, Invitrogen), goat anti-guinea pig IgG Alexa Fluor 647 (#A21450, 1:500, Invitrogen).  
450 Unless otherwise stated, all chemicals were obtained from Sigma-Aldrich.

451

#### 452 ***In vitro* SUMOylation assays and decatenation assays**

453 The SUMOylation reactions performed in the Reaction buffer (20 mM Hepes, pH 7.8, 100 mM NaCl, 5  
454 mM MgCl<sub>2</sub>, 0.05% Tween 20, 5% glycerol, 2.5mM ATP, and 1 mM DTT) by adding 15 nM E1, 15 nM  
455 Ubc9, 45 nM PIASy, 500 nM T7-tagged TopoII $\alpha$ , and 5  $\mu$ M SUMO2-GG. For the non-SUMOylated  
456 TopoII $\alpha$  control, 5  $\mu$ M SUMO2-G mutant was used instead of SUMO2-GG. After the reaction with the  
457 incubation for one hour at 25°C, it was stopped with the addition of EDTA at a final concentration of 10mM.  
458 For the analysis of the SUMOylation profile of TopoII $\alpha$  1.5X SDS-PAGE sample buffer was added to  
459 reaction, and the samples were resolved on 8–16% Tris-HCl gradient gels (#XP08165BOX, Invitrogen) by  
460 SDS-PAGE, then analyzed by Western blotting with HRP-conjugated anti-T7 monoclonal antibody  
461 (#T3699, EMD Millipore/Novagen).

462 Decatenation assays were performed in the Decatenation buffer (50 mM Tris-HCl, pH 8.0, 120 mM NaCl,  
463 5 mM MgCl<sub>2</sub>, 0.5 mM DTT, 30  $\mu$ g BSA/ml, and 2 mM ATP) with SUMOylated TopoII $\alpha$  and non-  
464 SUMOylated TopoII $\alpha$ n and with 6.2 ng/ $\mu$ l of kDNA (TopoGEN, Inc.). The reaction was performed at 25°C  
465 with the conditions indicated in each of the figures. The reactions were stopped by adding one third volume  
466 of 6X DNA dye (30% glycerol, 0.1% SDS, 10 mM EDTA, and 0.2  $\mu$ g/ $\mu$ l bromophenol blue). The samples  
467 were loaded on a 1% agarose gel containing SYBR™ Safe DNA Gel stain (#S33102, Invitrogen) with 1kb  
468 ladder (#N3232S, NEB), and electrophoresed at 100 V in TAE buffer (Tris-acetate-EDTA) until the marker  
469 dye reached the middle of the gel. The amount of kDNA remaining in the wells was measured using  
470 ImageStudio, and the percentage of decatenated DNA was calculated as (Intensity of initial kDNA [at 0  
471 minutes incubation] - intensity of remaining catenated DNA)/Intensity of initial kDNA. Obtained  
472 percentages of catenated DNA was plotted and analyzed for the statistics by using GraphPad Prism 8  
473 Software.

474

#### 475 **Cell culture, Transfection, and Colony Isolation**

476 Targeted insertion using the CRISPR/Cas9 system was used for all integration of exogenous sequences into  
477 the genome. Either HCT116 cells or DLD-1 cells were transfected with guide plasmids and donor plasmid  
478 using ViaFect™ (#E4981, Promega) on 3.5cm dishes. The cells were split and re-plated on 10cm dishes at  
479 ~20% confluency, two days after, the cells were subjected to a selection process by maintaining in the  
480 medium in a presence of desired selection reagent (1 $\mu$ g/ml Blasticidin (#ant-bl, Invivogen), 1 $\mu$ g/ml  
481 puromycin (#ant-pr, Invivogen), 200 $\mu$ g/ml Hygromycin B Gold (#ant-hg, Invivogen)). The cells were  
482 cultured for 10 to 14 days with a selection medium, the colonies were isolated and grown in 24 well plates,  
483 and prepared Western blotting and genomic DNA samples to verify the insertion of the transgene.  
484 Specifically, for the Western blotting analysis, the cells were pelleted, 1X SDS PAGE sample buffer was  
485 added, and boiled/vortexed. Samples were separated on an 8-16% gel and then blocked with Casein and  
486 probed using the indicated antibody described in each figure legend. Signals were acquired using the LI-  
487 COR Odyssey Fc imager. To perform genomic PCR, the cells were pelleted, genomic DNA was extracted  
488 using lysis buffer (100mM Tris-HCl pH 8.0, 200mM NaCl, 5mM EDTA, 1% SDS, and 0.6mg/mL  
489 proteinase K (#P8107S, NEB)), and purified by ethanol precipitation followed by resuspension with TE  
490 buffer containing 50 $\mu$ g/mL RNase A (#EN0531, ThermoFisher). Primers used for confirming the proper  
491 integrations are listed in the supplemental information.

492 To establish AID cell lines, as an initial step, the *Oryza sativa* E3 ligase (OsTIR1) gene was inserted into  
493 the 3' end of a housekeeping gene, RCC1, using CRISPR/Cas9 system in the DLD-1 cell line. The RCC1  
494 locus was an appropriate locus to accomplish the modest but sufficient expression level of the OsTIR1

495 protein so that it would not induce a non-specific degradation without the addition of Auxin  
496 (Supplemental Figure S1). We then introduced DNA coding for AID-3xFlag tag into the TopoII $\alpha$  or  
497 PICH locus using CRISPR/Cas9 editing into the OsTIR1 expressing parental line (Supplemental Figure  
498 S2A). The isolated candidate clones were subjected to genomic PCR and Western blotting analysis to  
499 validate integration of the transgene (Supplemental Figure S2 B, C and S4 B, C). Once clones were  
500 established and the transgene integration was validated, the depletion of the protein in the auxin-treated  
501 cells was confirmed by Western blotting and immunostaining (Supplemental Figure S2D and S4C).

502

### 503 **Xenopus egg extract assay for mitotic chromosomal SUMOylation analysis**

504 Low speed cyostatic factor (CSF) arrested Xenopus egg extracts (XEEs) and demembrated sperm nuclei  
505 were prepared following standard protocols (Murray, 1991, Powers et al., 2001). To prepare the mitotic  
506 replicated chromosome, CSF extracts were driven into interphase by adding 0.6mM CaCl<sub>2</sub>. Demembrated  
507 sperm nuclei were added to interphase extract at 4000 sperm nuclei/ $\mu$ l, then incubated for ~60 min to  
508 complete DNA replication confirmed by the morphology of nuclei. Then, equal volume of CSF XEE was  
509 added to the reactions to induce mitosis. To confirm the activities of Py-S2 proteins on mitotic  
510 SUMOylation, the Py-S2 proteins or dnUbC9 were added to XEEs at a final concentration of 30nM and  
511 5 $\mu$ M, respectively, at the onset of mitosis-induction. After mitotic chromosome formation was confirmed  
512 by microscopic analysis of condensed mitotic chromosomes, chromosomes were isolated by centrifugation  
513 using 40% glycerol cushion as previously described (Yoshida et al., 2016) then the isolated mitotic  
514 chromosomes were boiled in SDS-PAGE sample buffer. Samples were resolved on 8-16% gradient gels  
515 and subjected to Western blotting with indicated antibodies. Signals were acquired using LI-COR Odyssey  
516 Fc digital imager and the quantification was performed using Image Studio Lite software.

517 The following primary antibodies were used for Western blotting: Rabbit anti-Xenopus TopoII $\alpha$  (1:10,000),  
518 Rabbit anti-Xenopus PARP1 (1:10,000), Rabbit anti-SUMO2/3 (1:1,000) (all prepared as described  
519 previously (Ryu et al., 2010a)), anti-Histone H3 (#14269, Cell Signaling).

520

### 521 **Preparation of mitotic cells and chromosome isolation**

522 HCT116 or DLD-1 cells were grown in McCoy's 5A 1x L-glutamine 10% FBS media for no more than 10  
523 passages. To analyze mitotic chromosomes, cells were synchronized by Thymidine/Nocodazole cell cycle  
524 arrest protocol. In brief, cells were arrested with 2mM Thymidine for 17 hours, were released from the  
525 Thymidine block by performing three washes with non-FBS containing McCoy's 5A 1x L-glutamine media  
526 and placed in fresh 10% FBS containing media. 6 hours after the Thymidine release, 0.1 $\mu$ g/mL Nocodazole  
527 was added to the cells for 4 additional hours, mitotic cells were isolated by performing a mitotic shake-off,  
528 and washed 3 times using McCoy's non-FBS containing media to release from Nocodazole. The released  
529 cells were resuspended with 10% FBS containing fresh media and 7 $\mu$ M of ICRF-193, 40 $\mu$ M Merbarone, or  
530 equal volume DMSO, were plated on Fibronectin coated cover slips, and incubated for 20 minutes  
531 (NEUVITRO, #GG-12-1.5-Fibronectin). To isolate mitotic chromosomes, the cells were lysed with lysis  
532 buffer (250mM Sucrose, 20mM HEPES, 100mM NaCl, 1.5mM MgCl<sub>2</sub>, 1mM EDTA, 1mM EGTA, 0.2%  
533 TritonX-100, 1:2000 LPC (Leupeptin, Pepstatin, Chymostatin, 20mg each/ml in DMSO; Sigma-Aldrich),  
534 and 20mM Iodoacetamide (Sigma-Aldrich #I1149)) incubated for 5 minutes on ice. Lysed cells were then  
535 placed on a 40% glycerol containing 0.025% Triton-X-100 cushion, and spun at 10,000xg for 5 minutes,  
536 twice. Isolated chromosomes were then boiled with SDS-PAGE sample buffer, resolved on an 8-16%  
537 gradient gel and subjected to Western blotting with indicated antibodies. Signals of the blotting were  
538 acquired using the LI-COR Odyssey Fc machine.

539 The following primary antibodies were used for Western blotting: Rabbit anti-PICH (1:1,000), Rabbit anti-  
540 TopoII $\alpha$  (1:20,000) (both are prepared as described above), Rabbit anti-SUMO2/3 (1:1,000), Rabbit anti-  
541 Histone H2A (1:2,000) (#18255, Abcam), Rabbit anti-Histone H3 (1:2,000) (#14269, Cell Signaling),  
542 Rabbit anti-PIASy (1:500) (as described in (Azuma et al., 2005)), Mouse anti- $\beta$ -actin (1:2,000) (#A2228,  
543 Sigma-Aldrich), Mouse anti-myc (1:1,000) (#9E10, Santa Cruz), Mouse anti- $\beta$ -tubulin (1:2,000) (#,  
544 Sigma-Aldrich), Mouse anti-Flag (1:1,000) (#F1804, Sigma-Aldrich).

545

546 **Cell fixation and staining**

547 To fix the mitotic cells on fibronectin coated cover slips, cells were incubated with 4% paraformaldehyde  
548 for 10 minutes at room temperature, and subsequently washed three times with 1X PBS containing 10mM  
549 Tris-HCl to quench PFA. Following the fixation, the cells were permeabilized using 100% ice cold  
550 Methanol in -20°C freezer for 5 minutes. Cells were then blocked using 2.5% hydrolyzed gelatin for 30  
551 minutes at room temperature. Following blocking the cells were stained with primary antibodies for 1 hour  
552 at room temperature, washed 3 times with 1X PBS containing 0.1% tween20, and incubated with secondary  
553 for 1 hour at room temperature. Following secondary incubation cells were washed 3 times with 1x PBS-T  
554 and mounted onto slide glass using VECTASHIELD® Antifade Mounting Medium with DAPI (#H-1200,  
555 Vector laboratory) and sealed with nail polish. Images were acquired using the Plan Apo 100x/1.4 objective  
556 lens on a Nikon Ti Eclipse microscope equipped Exi Aqua CCD camera (Q imaging) or a Nikon TE2000-  
557 U equipped PRIME-BSI CMOS camera (Photometrics) with MetaMorph imaging software. Adobe  
558 Photoshop (CS6) software was used to process the images for signal intensities and size according to journal  
559 policy. The Fiji colocalization threshold software was used to measure colocalization coefficients for at  
560 least 20 cells in three independent experiments.

561 The following primary antibodies were used for staining: Rabbit anti-PICH 1:800, Rabbit anti-human  
562 TopoII $\alpha$  1:1000 (both are prepared as described above), Mouse anti-human TopoII $\alpha$  1:300 (#Ab 189342,  
563 Abcam), Mouse anti-SUMO2/3 (#12F3, Cytoskeleton Inc), and Guinea Pig anti-SUMO2/3 (1:300) (  
564 prepared as previously described (Ryu et al., 2010a)).

565

566 **Statistical analysis**

567 All statistical analyses were performed with either 1- or 2-way ANOVA, followed by the appropriate post-  
568 hoc analyses for each of the analysis using GraphPad Prism 8 software.

569

570 **Animal use**

571 For XEE assay, frog eggs were collected from mature female *Xenopus laevis*, and sperm was obtained from  
572 matured male *Xenopus laevis*. Animal protocol for the usage of *Xenopus laevis* was approved by University  
573 of Kansas IACUC.

574

575 **Acknowledgements**

576 We thank Dr. M. Azuma at the University of Kansas for the use of her microscope and imaging software.  
577 We also thank Dr. D. Clarke at the University Minnesota and Dr. Yukiko Yamashita at the University of  
578 Michigan for the critical reading of the manuscript and comments on this project. This work was  
579 supported by NIH/NIGMS, GM112893 and, in part, by KUCC/CB pilot grant (KAN1000623). The  
580 establishment of AID-mediated knockdown system was supported V. Aksenova, A. Arnaoutov and M.  
581 Dasso whom are supported by the National Institute for Child Health and Human Development  
582 Intramural projects Z01 HD008954 and ZIA HD001902.

583

584 **Author Contributions**

585 VH conducted most of the experiments, created AID fused PICH cell line, prepared figures, and drafted the  
586 manuscript. HP prepared DNA constructs for genome editing, created CRISPR/Cas9 genome edited  
587 HCT116 lines for inducible expression of de-SUMOylation enzyme and for Os-TIR1 expressing DLD-1  
588 cell line, created AID fused TopoII $\alpha$  cell lines, and performed XEE assay for validation of Py-S2 proteins.  
589 NP conducted experiments for initial validation of the genome edited cell lines expressing Py-S2. BL  
590 performed analysis in Figure 6. VA, AA, and MD established AID-mediated degradation system by  
591 optimizing Os-TIR1 integration locus and creating constructs for genome editing by CRISPR/Cas9 for that  
592 system. YA designed the study, supervised project, and wrote the manuscript.

593

594 **Conflicts of Interest**

595 The authors declare no competing financial interests.

## References

- AGOSTINHO, M., SANTOS, V., FERREIRA, F., COSTA, R., CARDOSO, J., PINHEIRO, I., RINO, J., JAFFRAY, E., HAY, R. T. & FERREIRA, J. 2008. Conjugation of human topoisomerase 2 alpha with small ubiquitin-like modifiers 2/3 in response to topoisomerase inhibitors: cell cycle stage and chromosome domain specificity. *Cancer Res*, 68, 2409-18.
- AZUMA, Y., ARNAOUTOV, A., ANAN, T. & DASSO, M. 2005. PIASy mediates SUMO-2 conjugation of Topoisomerase-II on mitotic chromosomes. *EMBO J*, 24, 2172-82.
- AZUMA, Y., ARNAOUTOV, A. & DASSO, M. 2003. SUMO-2/3 regulates topoisomerase II in mitosis. *J Cell Biol*, 163, 477-87.
- BAUER, D. L., MARIE, R., RASMUSSEN, K. H., KRISTENSEN, A. & MIR, K. U. 2012. DNA catenation maintains structure of human metaphase chromosomes. *Nucleic Acids Res*, 40, 11428-34.
- BAUMANN, C., KORNER, R., HOFMANN, K. & NIGG, E. A. 2007. PICH, a centromere-associated SNF2 family ATPase, is regulated by Plk1 and required for the spindle checkpoint. *Cell*, 128, 101-14.
- BIEBRICHER, A., HIRANO, S., ENZLIN, J. H., WIECHENS, N., STREICHER, W. W., HUTTNER, D., WANG, L. H., NIGG, E. A., OWEN-HUGHES, T., LIU, Y., PETERMAN, E., WUITE, G. J. L. & HICKSON, I. D. 2013. PICH: a DNA translocase specially adapted for processing anaphase bridge DNA. *Mol Cell*, 51, 691-701.
- CHAN, K. L., NORTH, P. S. & HICKSON, I. D. 2007. BLM is required for faithful chromosome segregation and its localization defines a class of ultrafine anaphase bridges. *EMBO J*, 26, 3397-409.
- CONG, L., RAN, F. A., COX, D., LIN, S., BARRETTO, R., HABIB, N., HSU, P. D., WU, X., JIANG, W., MARRAFFINI, L. A. & ZHANG, F. 2013. Multiplex genome engineering using CRISPR/Cas systems. *Science*, 339, 819-23.
- CUBENAS-POTTS, C., GOERES, J. D. & MATUNIS, M. J. 2013. SENP1 and SENP2 affect spatial and temporal control of sumoylation in mitosis. *Mol Biol Cell*, 24, 3483-95.
- DAI, J., SULTAN, S., TAYLOR, S. S. & HIGGINS, J. M. 2005. The kinase haspin is required for mitotic histone H3 Thr 3 phosphorylation and normal metaphase chromosome alignment. *Genes Dev*, 19, 472-88.
- FORTUNE, J. M. & OSHEROFF, N. 1998. Merbarone inhibits the catalytic activity of human topoisomerase IIalpha by blocking DNA cleavage. *J Biol Chem*, 273, 17643-50.
- GOMEZ, R., VIERA, A., BERENQUER, I., LLANO, E., PENDAS, A. M., BARBERO, J. L., KIKUCHI, A. & SUJA, J. A. 2014. Cohesin removal precedes topoisomerase IIalpha-dependent decatenation at centromeres in male mammalian meiosis II. *Chromosoma*, 123, 129-46.
- HARI, K. L., COOK, K. R. & KARPEN, G. H. 2001. The Drosophila Su(var)2-10 locus regulates chromosome structure and function and encodes a member of the PIAS protein family. *Genes Dev*, 15, 1334-48.
- HENGEVELD, R. C., DE BOER, H. R., SCHOONEN, P. M., DE VRIES, E. G., LENS, S. M. & VAN VUGT, M. A. 2015. Rif1 Is Required for Resolution of Ultrafine DNA Bridges in Anaphase to Ensure Genomic Stability. *Dev Cell*, 34, 466-74.
- HOLLAND, A. J., FACHINETTI, D., HAN, J. S. & CLEVELAND, D. W. 2012. Inducible, reversible system for the rapid and complete degradation of proteins in mammalian cells. *Proc Natl Acad Sci U S A*, 109, E3350-7.
- ISIK, S., SANO, K., TSUTSUI, K., SEKI, M., ENOMOTO, T., SAITOH, H. & TSUTSUI, K. 2003. The SUMO pathway is required for selective degradation of DNA topoisomerase IIbeta induced by a catalytic inhibitor ICRF-193(1). *FEBS Lett*, 546, 374-8.
- KAULICH, M., CUBIZOLLES, F. & NIGG, E. A. 2012. On the regulation, function, and localization of the DNA-dependent ATPase PICH. *Chromosoma*, 121, 395-408.

- KE, Y., HUH, J. W., WARRINGTON, R., LI, B., WU, N., LENG, M., ZHANG, J., BALL, H. L., LI, B. & YU, H. 2011. PICH and BLM limit histone association with anaphase centromeric DNA threads and promote their resolution. *EMBO J*, 30, 3309-21.
- KUMAGAI, A. & DUNPHY, W. G. 2003. Repeated phosphopeptide motifs in Claspin mediate the regulated binding of Chk1. *Nat Cell Biol*, 5, 161-5.
- KURASAWA, Y. & YU-LEE, L. Y. 2010. PICH and cotargeted Plk1 coordinately maintain prometaphase chromosome arm architecture. *Mol Biol Cell*, 21, 1188-99.
- LOSADA, A., HIRANO, M. & HIRANO, T. 1998. Identification of Xenopus SMC protein complexes required for sister chromatid cohesion. *Genes Dev*, 12, 1986-97.
- LUO, K., YUAN, J., CHEN, J. & LOU, Z. 2009. Topoisomerase IIalpha controls the decatenation checkpoint. *Nat Cell Biol*, 11, 204-10.
- MAO, Y., DESAI, S. D. & LIU, L. F. 2000. SUMO-1 conjugation to human DNA topoisomerase II isozymes. *J Biol Chem*, 275, 26066-73.
- MICHAELIS, C., CIOSK, R. & NASMYTH, K. 1997. Cohesins: chromosomal proteins that prevent premature separation of sister chromatids. *Cell*, 91, 35-45.
- MORALES, C. & LOSADA, A. 2018. Establishing and dissolving cohesion during the vertebrate cell cycle. *Curr Opin Cell Biol*, 52, 51-57.
- MORAWSKA, M. & ULRICH, H. D. 2013. An expanded tool kit for the auxin-inducible degron system in budding yeast. *Yeast*, 30, 341-51.
- MUKHOPADHYAY, D., ARNAOUTOV, A. & DASSO, M. 2010. The SUMO protease SENP6 is essential for inner kinetochore assembly. *J Cell Biol*, 188, 681-92.
- MURRAY, A. W. 1991. Cell cycle extracts. *Methods Cell Biol*, 36, 581-605.
- MYATT, S. S., KONGSEMA, M., MAN, C. W., KELLY, D. J., GOMES, A. R., KHONGKOW, P., KARUNARATHNA, U., ZONA, S., LANGER, J. K., DUNSBY, C. W., COOMBES, R. C., FRENCH, P. M., BROSENS, J. J. & LAM, E. W. 2014. SUMOylation inhibits FOXM1 activity and delays mitotic transition. *Oncogene*, 33, 4316-29.
- NAKAZAWA, N., ARAKAWA, O., EBE, M. & YANAGIDA, M. 2019. Casein kinase II-dependent phosphorylation of DNA topoisomerase II suppresses the effect of a catalytic topo II inhibitor, ICRF-193, in fission yeast. *J Biol Chem*, 294, 3772-3782.
- NATSUME, T., KIYOMITSU, T., SAGA, Y. & KANEMAKI, M. T. 2016. Rapid Protein Depletion in Human Cells by Auxin-Inducible Degron Tagging with Short Homology Donors. *Cell Rep*, 15, 210-8.
- NIELSEN, C. F., HUTTNER, D., BIZARD, A. H., HIRANO, S., LI, T. N., PALMAI-PALLAG, T., BJERREGAARD, V. A., LIU, Y., NIGG, E. A., WANG, L. H. & HICKSON, I. D. 2015. PICH promotes sister chromatid disjunction and co-operates with topoisomerase II in mitosis. *Nat Commun*, 6, 8962.
- NISHIMURA, K., FUKAGAWA, T., TAKISAWA, H., KAKIMOTO, T. & KANEMAKI, M. 2009. An auxin-based degron system for the rapid depletion of proteins in nonplant cells. *Nat Methods*, 6, 917-22.
- PATEL, S., JAZRAWI, E., CREIGHTON, A. M., AUSTIN, C. A. & FISHER, L. M. 2000. Probing the interaction of the cytotoxic bisdioxopiperazine ICRF-193 with the closed enzyme clamp of human topoisomerase IIalpha. *Mol Pharmacol*, 58, 560-8.
- POWERS, M., EVANS, E. K., YANG, J. & KORNBLUTH, S. 2001. Preparation and use of interphase Xenopus egg extracts. *Curr Protoc Cell Biol*, Chapter 11, Unit 11 10.
- REVERTER, D. & LIMA, C. D. 2004. A basis for SUMO protease specificity provided by analysis of human Senp2 and a Senp2-SUMO complex. *Structure*, 12, 1519-31.
- REVERTER, D. & LIMA, C. D. 2006. Structural basis for SENP2 protease interactions with SUMO precursors and conjugated substrates. *Nat Struct Mol Biol*, 13, 1060-8.
- ROCA, J., ISHIDA, R., BERGER, J. M., ANDOH, T. & WANG, J. C. 1994. Antitumor bisdioxopiperazines inhibit yeast DNA topoisomerase II by trapping the enzyme in the form of a closed protein clamp. *Proc Natl Acad Sci U S A*, 91, 1781-5.

- RYU, H., AL-ANI, G., DECKERT, K., KIRKPATRICK, D., GYGI, S. P., DASSO, M. & AZUMA, Y. 2010a. PIASy mediates SUMO-2/3 conjugation of poly(ADP-ribose) polymerase 1 (PARP1) on mitotic chromosomes. *J Biol Chem*, 285, 14415-23.
- RYU, H. & AZUMA, Y. 2010. Rod/Zw10 complex is required for PIASy-dependent centromeric SUMOylation. *J Biol Chem*, 285, 32576-85.
- RYU, H., FURUTA, M., KIRKPATRICK, D., GYGI, S. P. & AZUMA, Y. 2010b. PIASy-dependent SUMOylation regulates DNA topoisomerase IIalpha activity. *J Cell Biol*, 191, 783-94.
- RYU, H., YOSHIDA, M. M., SRIDHARAN, V., KUMAGAI, A., DUNPHY, W. G., DASSO, M. & AZUMA, Y. 2015. SUMOylation of the C-terminal domain of DNA topoisomerase IIalpha regulates the centromeric localization of Claspin. *Cell Cycle*, 14, 2777-84.
- SCHIMMEL, J., EIFLER, K., SIGURETHSSON, J. O., CUIJPERS, S. A., HENDRIKS, I. A., VERLAAN-DE VRIES, M., KELSTRUP, C. D., FRANCAVILLA, C., MEDEMA, R. H., OLSEN, J. V. & VERTEGAAL, A. C. 2014. Uncovering SUMOylation dynamics during cell-cycle progression reveals FoxM1 as a key mitotic SUMO target protein. *Mol Cell*, 53, 1053-66.
- SHAMU, C. E. & MURRAY, A. W. 1992. Sister chromatid separation in frog egg extracts requires DNA topoisomerase II activity during anaphase. *J Cell Biol*, 117, 921-34.
- SHCHERBAKOVA, D. M., BALOBAN, M., EMELYANOV, A. V., BRENOWITZ, M., GUO, P. & VERKHUSHA, V. V. 2016. Bright monomeric near-infrared fluorescent proteins as tags and biosensors for multiscale imaging. *Nat Commun*, 7, 12405.
- SPENCE, J. M., PHUA, H. H., MILLS, W., CARPENTER, A. J., PORTER, A. C. & FARR, C. J. 2007. Depletion of topoisomerase IIalpha leads to shortening of the metaphase interkinetochore distance and abnormal persistence of PICH-coated anaphase threads. *J Cell Sci*, 120, 3952-64.
- SRIDHARAN, V. & AZUMA, Y. 2016. SUMO-interacting motifs (SIMs) in Polo-like kinase 1-interacting checkpoint helicase (PICH) ensure proper chromosome segregation during mitosis. *Cell Cycle*, 15, 2135-2144.
- SRIDHARAN, V., PARK, H., RYU, H. & AZUMA, Y. 2015. SUMOylation regulates polo-like kinase 1-interacting checkpoint helicase (PICH) during mitosis. *J Biol Chem*, 290, 3269-76.
- WANG, L. H., MAYER, B., STEMMANN, O. & NIGG, E. A. 2010. Centromere DNA decatenation depends on cohesin removal and is required for mammalian cell division. *J Cell Sci*, 123, 806-13.
- WANG, L. H., SCHWARZBRAUN, T., SPEICHER, M. R. & NIGG, E. A. 2008. Persistence of DNA threads in human anaphase cells suggests late completion of sister chromatid decatenation. *Chromosoma*, 117, 123-35.
- WHITEHOUSE, I., STOCKDALE, C., FLAUS, A., SZCZELKUN, M. D. & OWEN-HUGHES, T. 2003. Evidence for DNA translocation by the ISWI chromatin-remodeling enzyme. *Mol Cell Biol*, 23, 1935-45.
- YOSHIDA, M. M., TING, L., GYGI, S. P. & AZUMA, Y. 2016. SUMOylation of DNA topoisomerase IIalpha regulates histone H3 kinase Haspin and H3 phosphorylation in mitosis. *J Cell Biol*, 213, 665-78.
- ZHANG, X. D., GOERES, J., ZHANG, H., YEN, T. J., PORTER, A. C. & MATUNIS, M. J. 2008. SUMO-2/3 modification and binding regulate the association of CENP-E with kinetochores and progression through mitosis. *Mol Cell*, 29, 729-41.

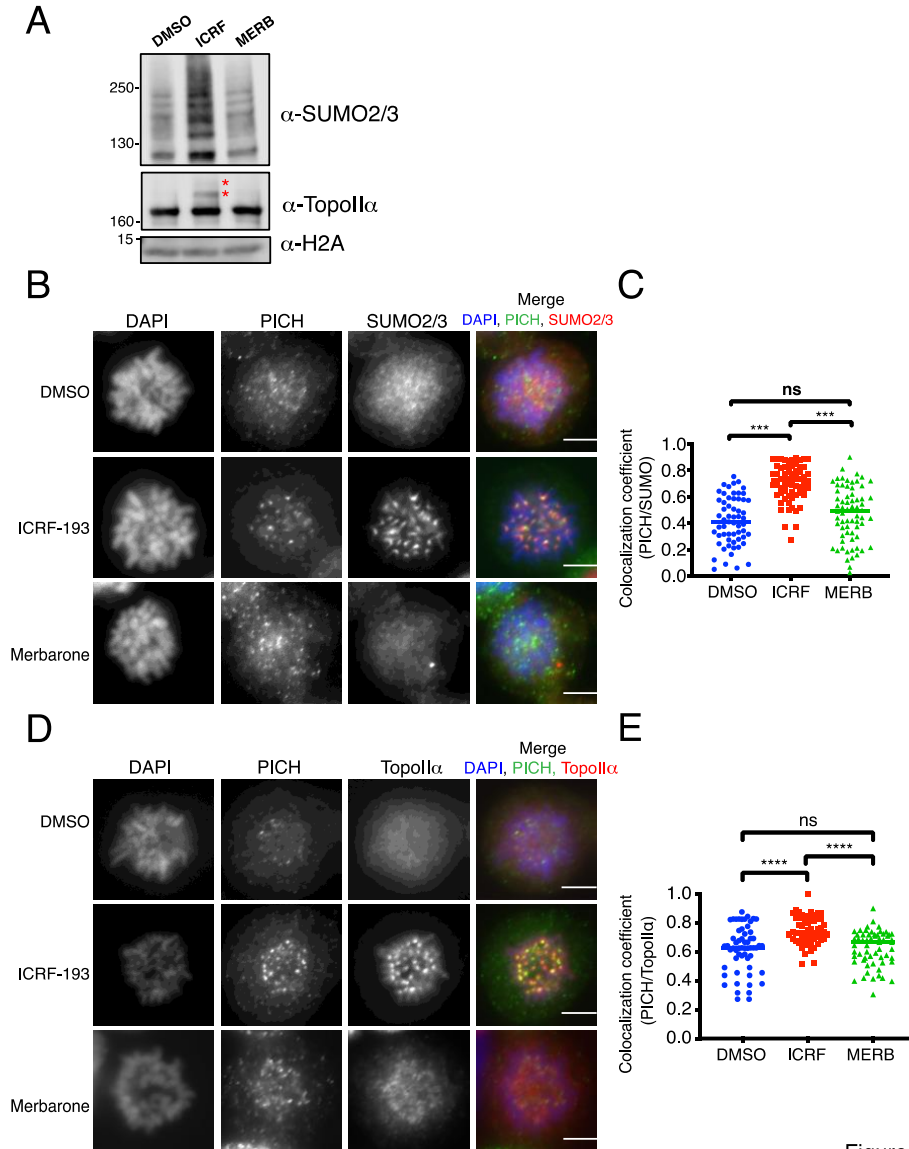

Figure 1

**Figure 1. TopoII $\alpha$  inhibition by ICRF-193 leads to PICH/SUMO2/3 and PICH/TopoII $\alpha$  colocalization.**

(A) HCT116 cells were synchronized and treated with indicated inhibitors (ICRF-193: ICRF, and Merbarone: Merb). Mitotic chromosomes were isolated and subjected to Western blotting with indicated antibodies. \* indicates SUMOylated TopoII $\alpha$ .

(B) Mitotic cells treated with DMSO, ICRF-193, and Merbarone were stained with antibodies against: PICH (green) and SUMO2/3 (red). DAPI shows DNA (blue). Scale bar = 10 $\mu$ m.

(C) A minimum of twenty prometaphase cell images were obtained in each group from three independent experiments, and the colocalization coefficients between PICH/SUMO2/3 was calculated and plotted.

(D) Mitotic cells were treated as in B and stained with antibodies against: PICH (green), TopoII $\alpha$  (red). DNA was stained with DAPI (blue). Scale bar = 10 $\mu$ m.

(E) Colocalization coefficients were analyzed as described in C.

p values for comparison among three experiments were calculated using a one-way ANOVA analysis of variance with Tukey multi-comparison correction. ns: not significant; \*:  $p \leq 0.05$ ; \*\*\*:  $p < 0.001$ ; \*\*\*\*:  $p < 0.0001$



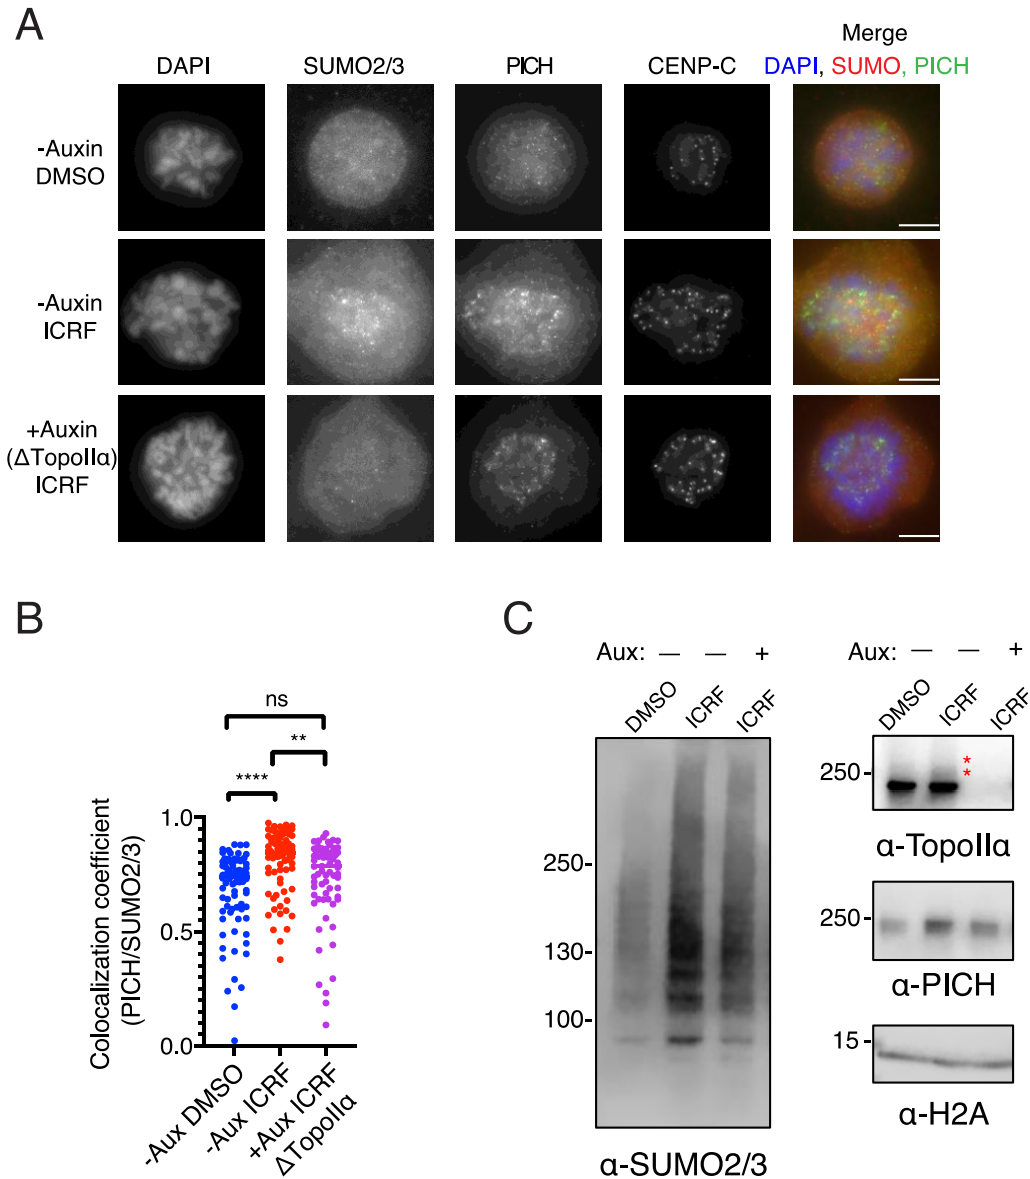

Figure 2

**Figure 2. Depletion of TopoII $\alpha$  attenuates SUMO2/3 modification and decreases PICH/SUMO2/3 colocalization at the centromere in ICRF-193 treated cells.**

(A) DLD-1 cells with endogenous TopoII $\alpha$  tagged with an AID were synchronized in mitosis and treated with DMSO and ICRF-193. Auxin was added to the cells for 6 hours after Thymidine release. Mitotic cells were fixed and stained with antibodies against: SUMO2/3 (red), PICH (green), CENP-C (not merged). DNA was stained with DAPI (blue). Scale bar = 10 $\mu$ m.

(B) The colocalization coefficients between PICH and SUMO2/3 of cells with indicated treatments (-/+Auxin and DMSO or ICRF) were measured. p values for comparison among four experiments were calculated using a one-way ANOVA analysis of variance with Tukey multi-comparison correction; ns: not significant; \*\*: p < 0.01; \*\*\*\*: p < 0.0001.

(C) Mitotic chromosomes were isolated with (+Aux) or without (-Aux) auxin treatment and DMSO or ICRF-193 and subjected to Western blotting with indicated antibodies. \* indicates SUMOylated TopoII $\alpha$ .

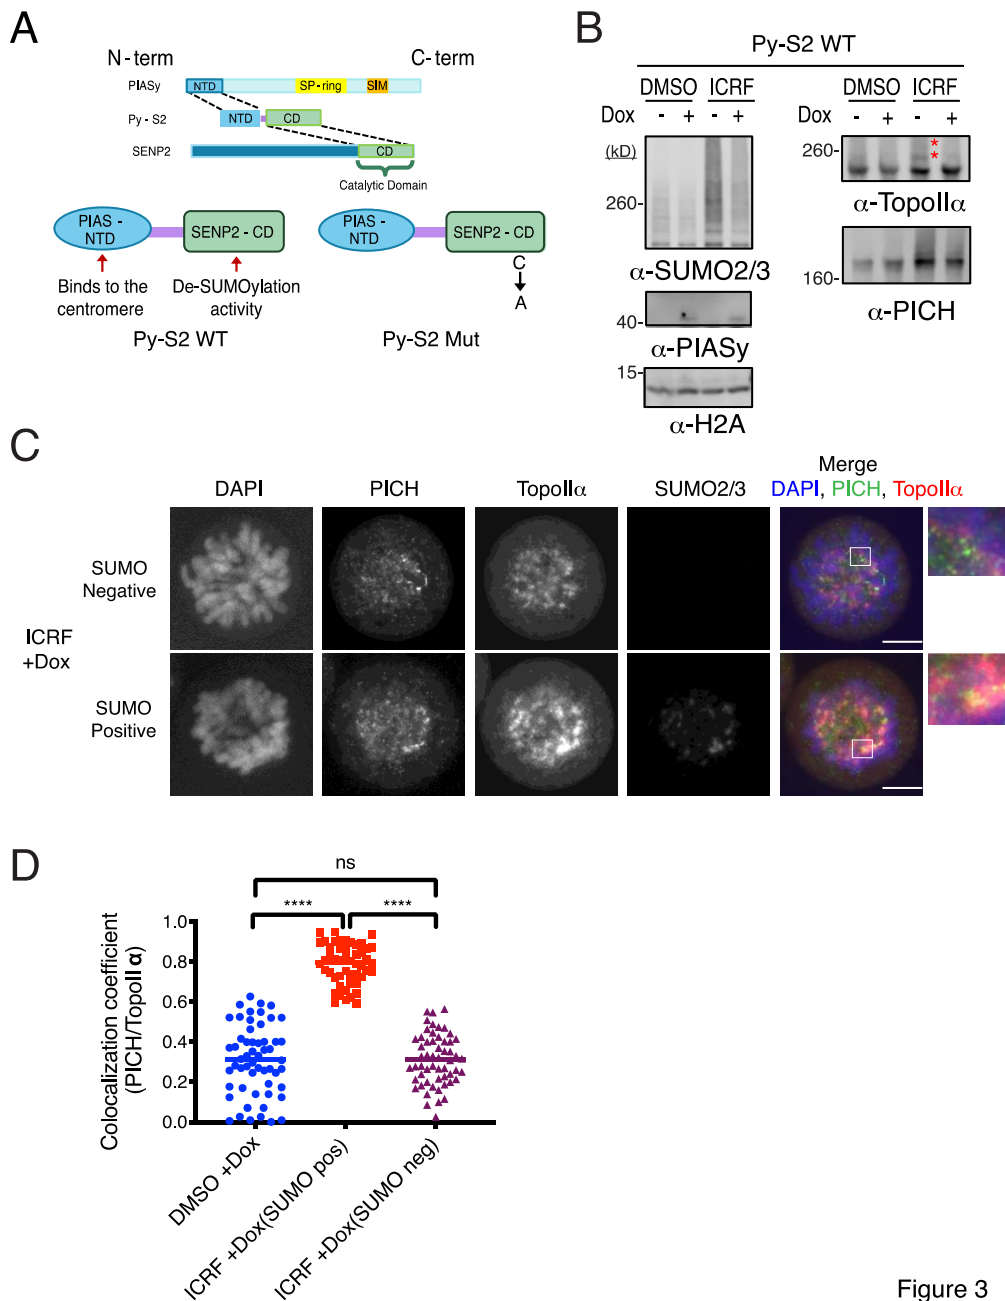

Figure 3

**Figure 3. DeSUMOylation enzyme inhibits PICH/TopoII $\alpha$  colocalization on chromosomes.**

(A) Schematic of fusion proteins generated for modulating SUMOylation on mitotic chromosomes.

(B) Mitotic chromosomes were subjected to Western blotting with indicated antibodies.

\* indicates SUMOylated TopoII $\alpha$ .

(C) Mitotic cells were fixed and stained with antibodies against: PICH (green), TopoII $\alpha$  (red), and SUMO2/3 (far red). DNA was stained by DAPI (blue). Scale bar = 10 $\mu$ m.

(D) The colocalization coefficients between PICH and TopoII $\alpha$  were measured in the cells with indicated treatments (+Doxycycline, +ICRF-193 or +DMSO) and categories (SUMO pos or SUMO neg).

p values for comparison among three experiments were calculated using a one-way ANOVA analysis of variance with Tukey multi-comparison correction. ns: not significant; \*\*\*\*: p < 0.0001

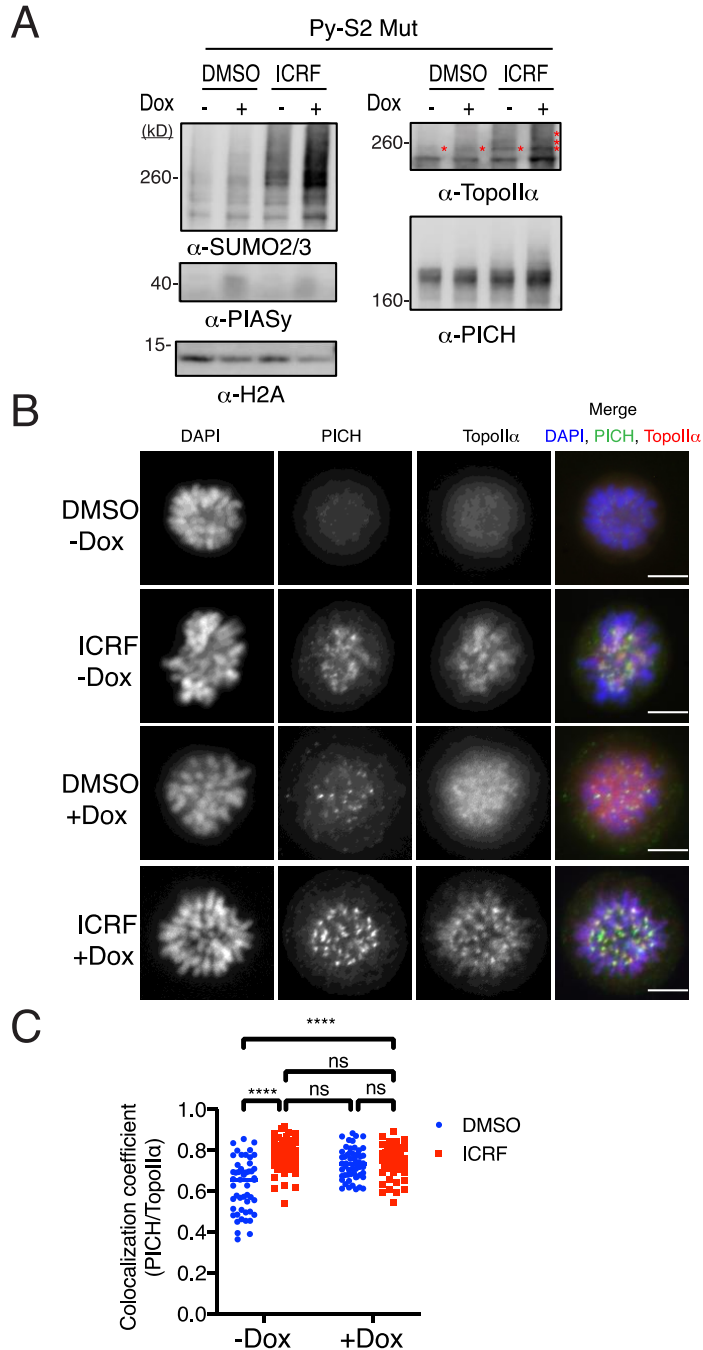

Figure 4

**Figure 4. Dominant mutant of deSUMOylation enzyme promotes PICH/TopoIIα colocalization on chromosomes**

(A) Mitotic chromosomes were isolated and subjected to Western blotting with indicated antibodies.

\* indicates SUMOylated TopoIIα.

(B) Mitotic cells were treated as indicated and fixed then stained with antibodies against: PICH (green) and TopoIIα (red). DNA was stained with DAPI (blue). Scale bar = 10μm.

(C) The colocalization coefficients between PICH and TopoIIα of cells with indicated treatments (+/- Doxycycline, +ICRF-193 or +DMSO) were measured. p values for comparison among three experiments were calculated using a two-way ANOVA analysis of variance with Tukey multi-comparison correction. ns: not significant; \*\*\*\*: p < 0.0001

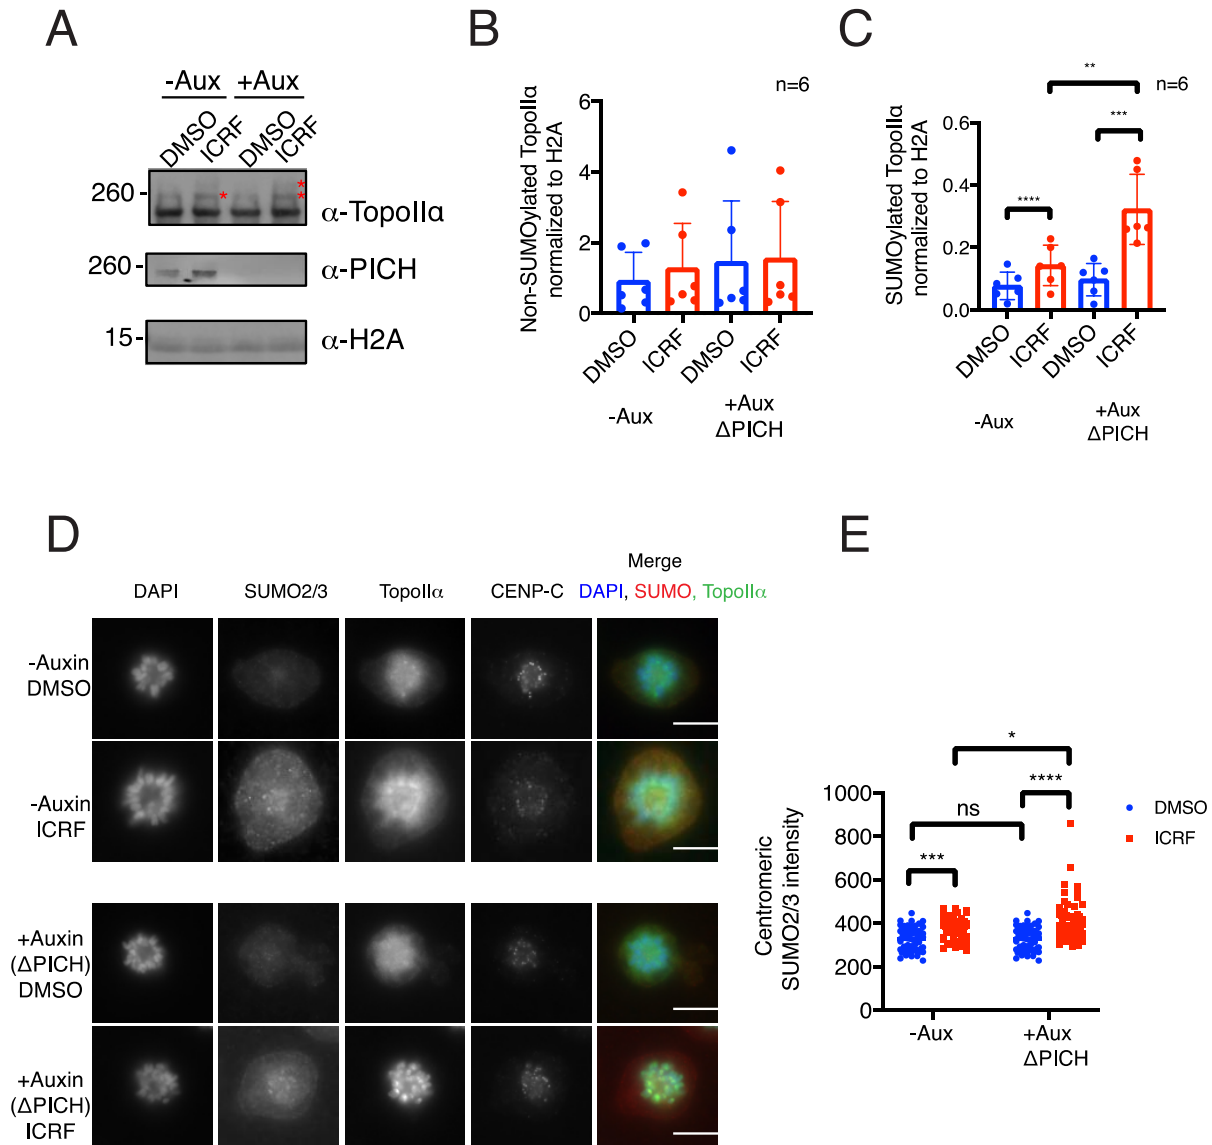

Figure 5

**Figure 5. Chromosomes of PICH depleted cell show increased level of SUMOylated TopoIIα.**

(A) DLD-1 cells with endogenous PICH tagged with an AID were synchronized in mitosis and treated with DMSO and ICRF-193. Auxin was added to the cells for 6 hours after Thymidine release. Mitotic chromosomes were isolated and subjected to Western blotting with indicated antibodies.

\* indicates SUMOylated TopoIIα.

(B) The intensity of non-SUMOylated TopoIIα signals normalized to H2A loading control.

(C) The intensity of SUMOylated TopoIIα signals normalized to H2A loading control.

(D) Mitotic cells were fixed and stained with antibodies against: SUMO2/3 (red), TopoIIα (green), CENP-C (far red). DNA was stained with DAPI (blue). Scale bar = 10μm.

(E) The intensity of centromeric SUMO2/3 from four independent experiments was measured using FIJI software. Statistical analysis of B and C and E were performed by using a one-way ANOVA analysis of variance with Tukey multi-comparison correction; p values for comparison among four conditions were calculated. ns: not significant; \*\*: p < 0.01; \*\*\*: p < 0.001; \*\*\*\*: p < 0.0001.

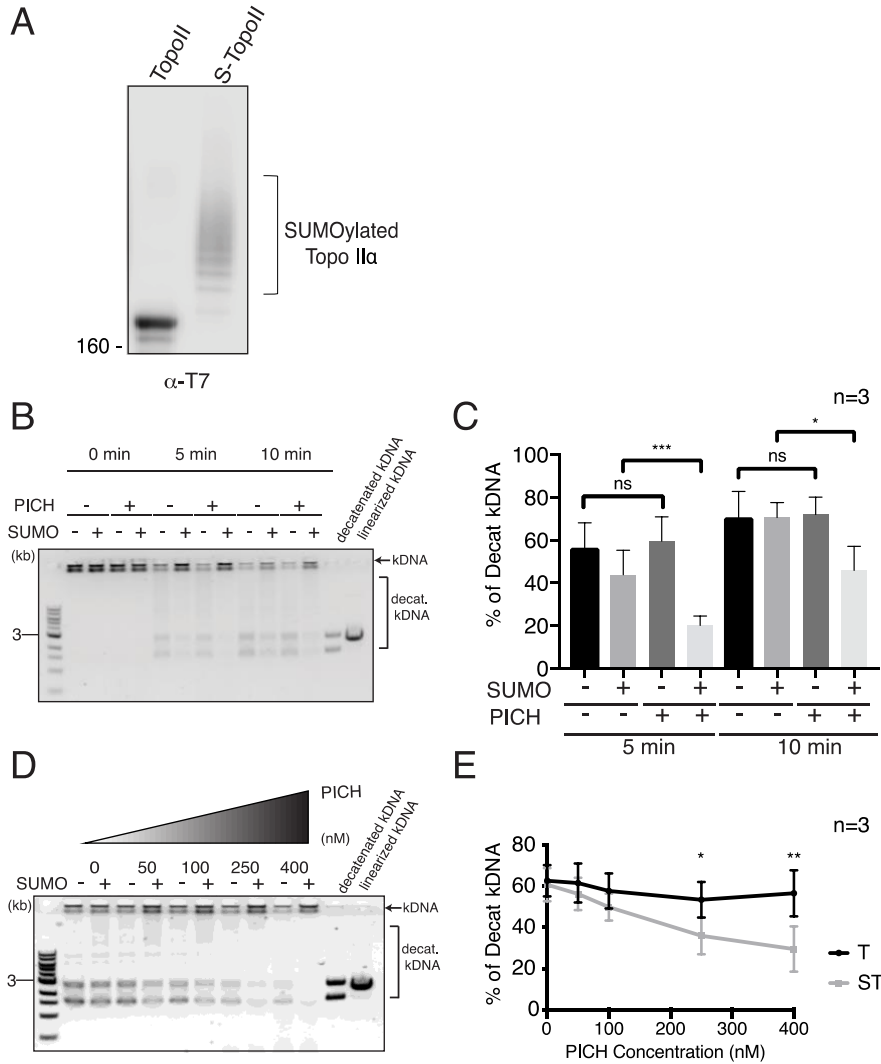

Figure 6

**Figure 6. PICH inhibits SUMOylated TopoIIα decatenation activity.**

(A) Recombinant T7 tagged TopoIIα proteins were SUMOylated *in vitro*. Samples were subjected to Western blotting using anti-T7 tag antibody.

(B) Decatenation of catenated kDNA in the indicated conditions (+/- PICH with non-SUMOylated TopoIIα (indicated as — SUMO) or SUMOylated TopoIIα (indicated as +SUMO)) were analyzed by DNA gel electrophoresis. Catenated kDNA is indicated by an arrow. Brackets indicate the decatenated kDNA species.

(C) The decatenation activity of reactions in B was calculated as a percentage of decatenated kDNA.

(D) Decatenation of catenated kDNA in SUMOylated and non-SUMOylated TopoIIα were analyzed by DNA gel electrophoresis with increasing concentrations of PICH. Catenated kDNA is indicated by an arrow. Brackets indicate decatenated kDNA species.

(E) The decatenation activity of SUMOylated (ST) and non-SUMOylated TopoIIα (T) in D was calculated as a percentage of decatenated kDNA.

Statistical analysis of C and E were performed by using a two-way ANOVA analysis of variance with Tukey multi-comparison correction; p values for comparison among six conditions were calculated. ns: not significant; \*:  $p \leq 0.05$ ; \*\*:  $p < 0.01$ ; \*\*\*:  $p < 0.001$

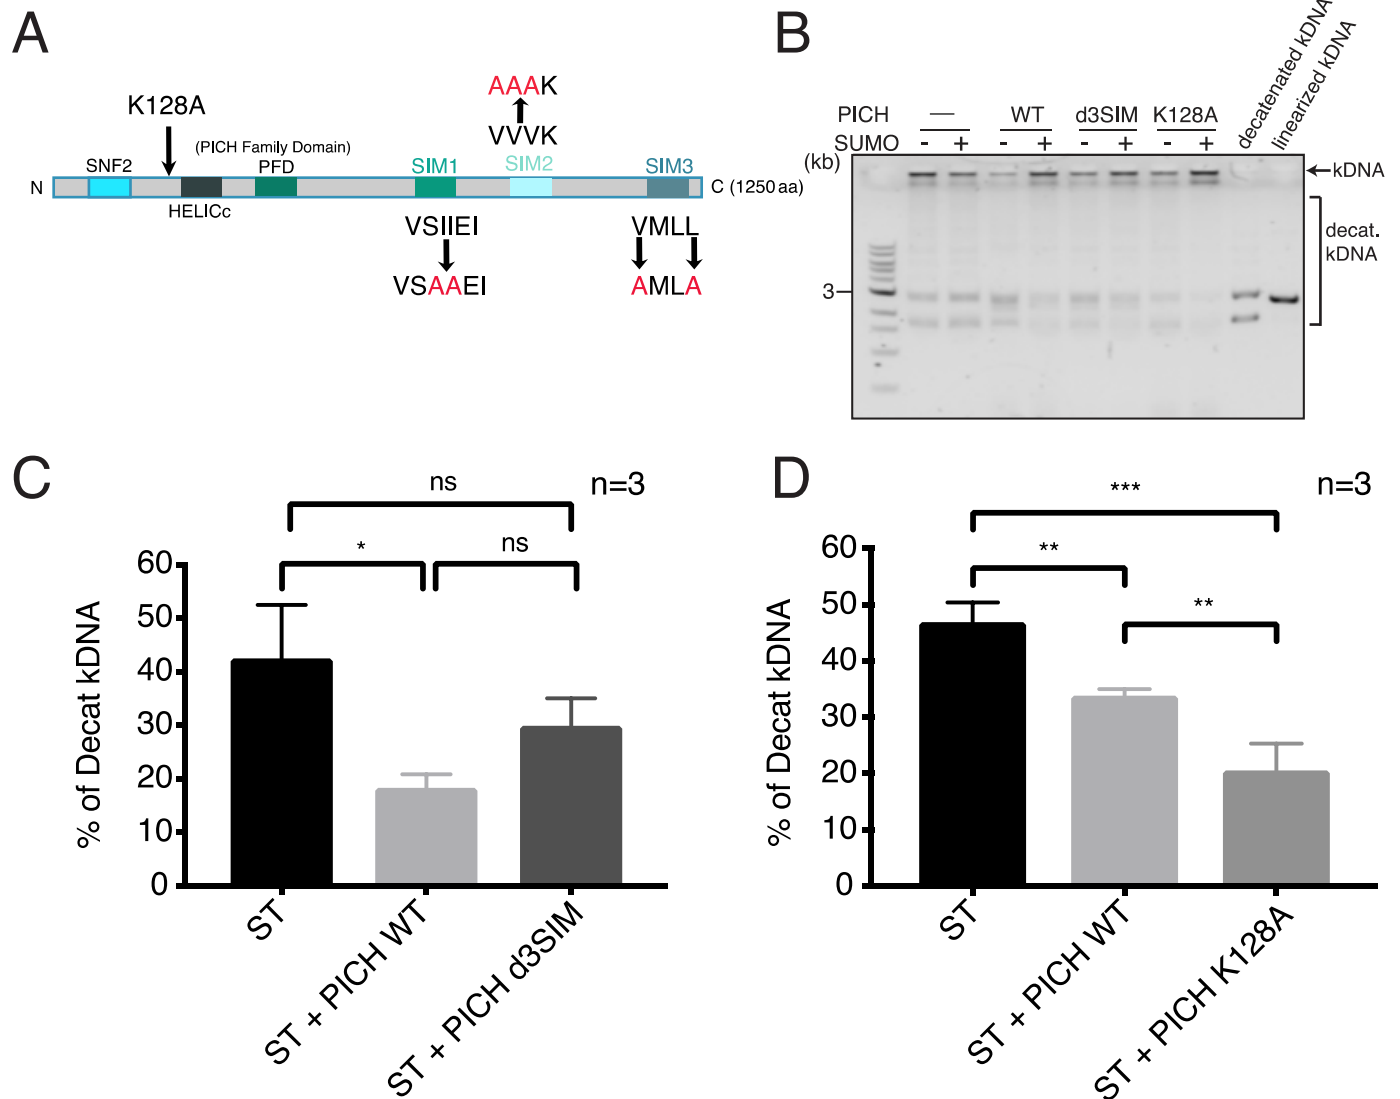

Figure 7

**Figure 7. Both SUMO-binding activity and translocase activity of PICH involved in regulation of SUMOylated TopoII $\alpha$  decatenation activity.**

(A) Schematic of PICH protein with known functional motifs. The introduced mutations in SIMs and in the ATPase domain (K128A) are indicated.

(B) Representative gel showing non-SUMOylated (-SUMO) and SUMOylated TopoII $\alpha$  (+SUMO) activity with PICH WT, a non-SUMO-binding mutant (d3SIM), and a translocase deficient mutant (K128A) or no PICH protein (-PICH). Catenated kDNA is indicated with an arrow. Brackets indicate decatenated kDNA species.

(C) Decatenation activity of SUMOylated TopoII $\alpha$  (ST) with indicated PICH (ST: no PICH, ST + PICH WT: PICH wild-type, ST + PICH d3SIM: PICH-d3SIM mutant).

(D) Decatenation activity of SUMOylated TopoII $\alpha$  (ST) with indicated PICH (ST: no PICH, ST + PICH WT: PICH wild-type, ST + PICH K128A: PICH-K128A mutant). Statistical analysis of B and C were performed by using a one-way ANOVA analysis of variance with Tukey multi-comparison correction; p values for comparison among six conditions were calculated.

ns: not significant; \*:  $p \leq 0.05$ ; \*\*:  $p < 0.01$ ; \*\*\*:  $p < 0.001$

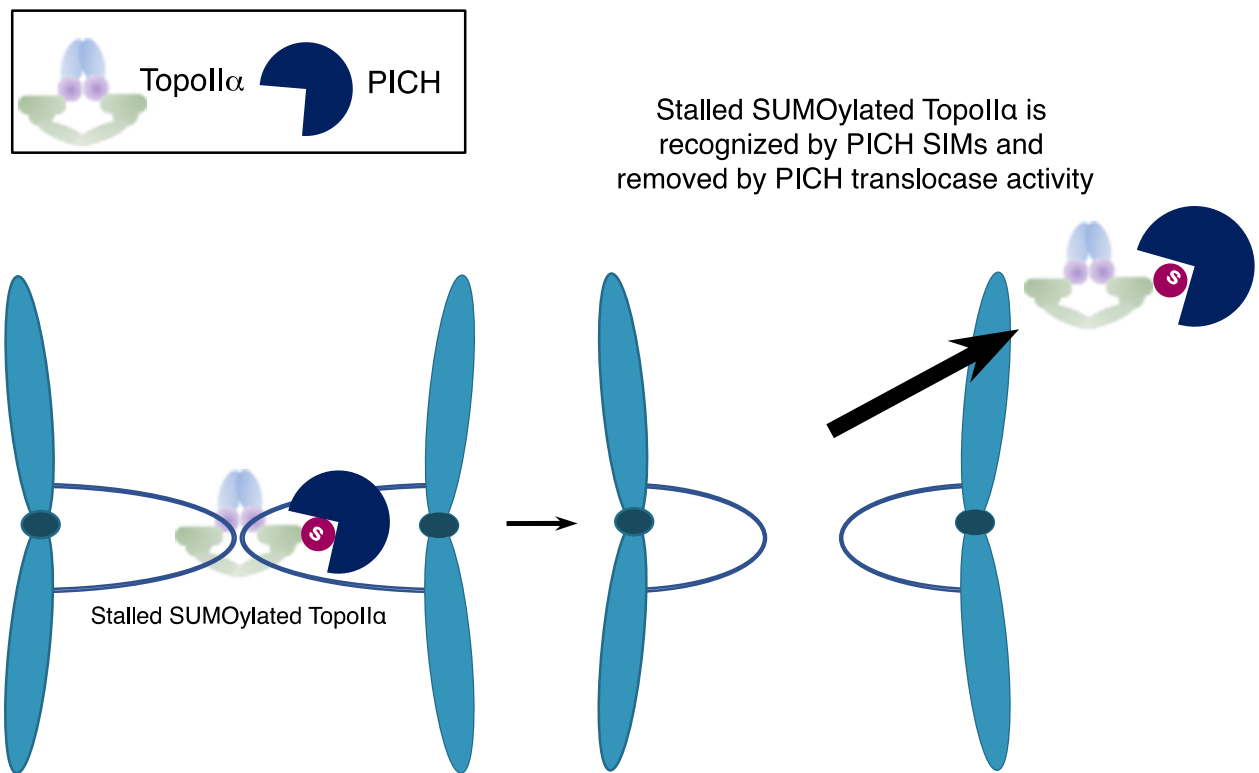

Figure 8

**Figure 8. The model for exhibiting the role of PICH on stalled SUMOylated TopoII $\alpha$  to promote sister chromatid disjunction.** During the metaphase-to-anaphase transition, TopoII $\alpha$  decatenates the last tangles of cohesed DNA between sister chromatids. The interlinked DNA molecules are released by the TopoII $\alpha$  Strand Passage Reaction (SPR). If TopoII $\alpha$  is stalled during the SPR, decatenated DNA molecules are bound within TopoII $\alpha$  protein, and this ultimately results in the formation of chromosome bridges. This TopoII $\alpha$  conformation is particularly susceptible to SUMOylation, thus becomes a critical target of PICH through its SIMs. WT PICH binds to SUMOylated TopoII $\alpha$  and removes stalled SUMOylated TopoII $\alpha$  using its translocase activity. Once the SUMOylated TopoII $\alpha$  is removed from DNA, the sister chromatids undergo faithful segregation. In contrast, if SUMOylation is attenuated, or PICH-SIMs are mutated, chromosome bridges will form because SUMOylated TopoII $\alpha$  will not be removed. If the ATPase domain of PICH is mutated, it still binds to the SUMOylated TopoII $\alpha$ , however, it does not remove TopoII $\alpha$  from DNA due to the loss of translocase activity, thus results in chromosome bridge formation.

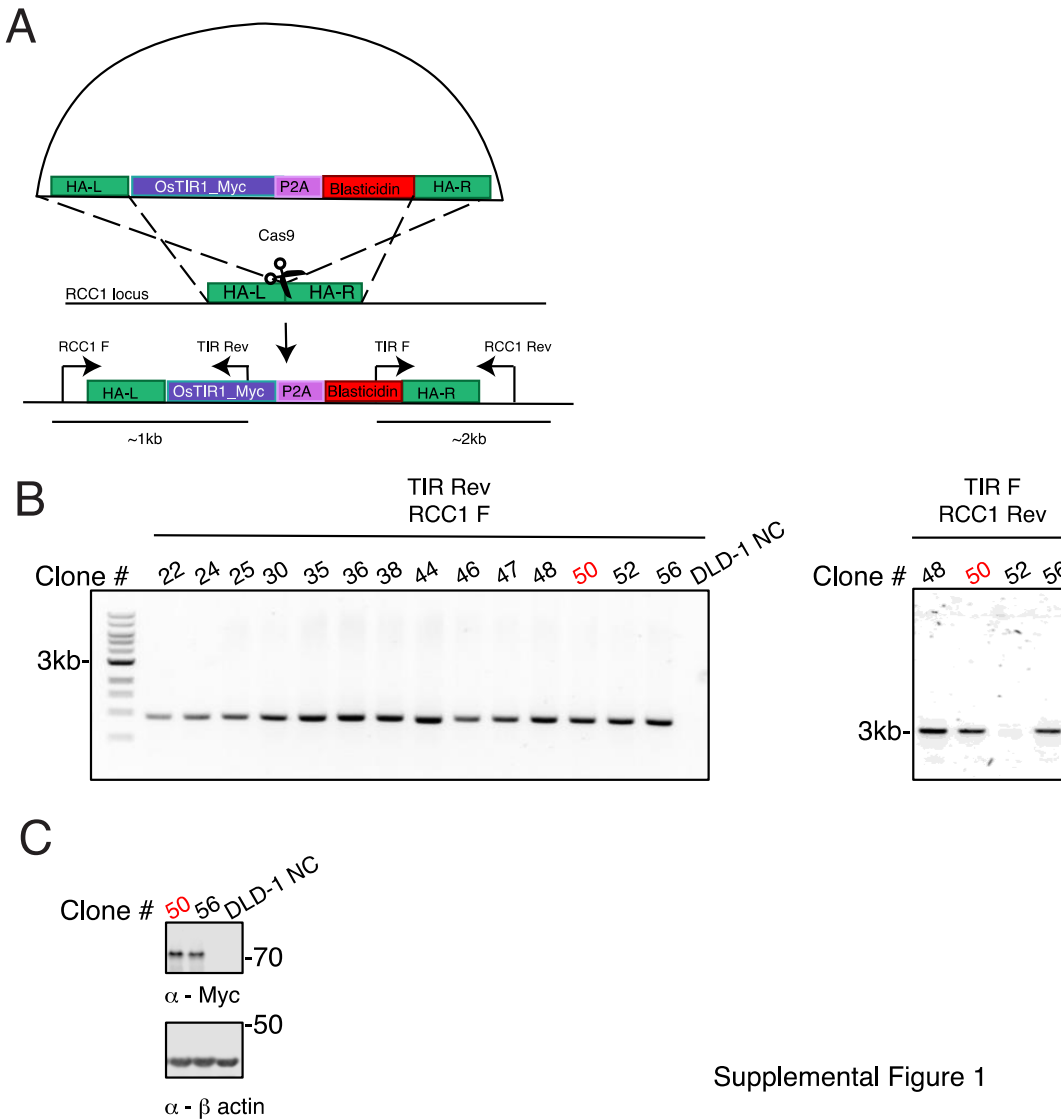

**Supplemental Figure S1 Construction of OsTIR1 expressing DLD-1 cell lines.**

(A) Experimental scheme for the establishment of OsTIR1 gene expressing DLD1 cell. RCC1-OsTIR1-Myc-P2A-Blasticidin donor plasmid, and two guide RNAs targeting the 3' end of RCC1 were used to integrate the OsTIR1 gene into the RCC1 locus.

(B) After the selection with 2ug/mL Blasticidin, fourteen clones were isolated and subjected to genomic PCR utilizing primers that targeted the 5' end of the construct (upper panel). Non-transfected DLD-1 cells were used as a negative control (DLD-1 NC). Clones #48, 50, 52 and 56 were further verified by genomic PCR using primers for 3' ends of the construct.

(C) Among the positive clones identified in B, two clones were chosen to verify the protein expression by Western blotting. Whole cell lysates obtained from asynchronous cell population were subjected to Western blotting. Non-transfected DLD-1 whole cell lysate was used as a negative control (DLD-1 NC). An anti-Myc antibody was used to detect OsTIR1 protein and anti- $\beta$ -actin was used as a loading control. Clone #50 (marked in red) was chosen to utilize for subsequent AID tagging for TopoII $\alpha$  and PICH.



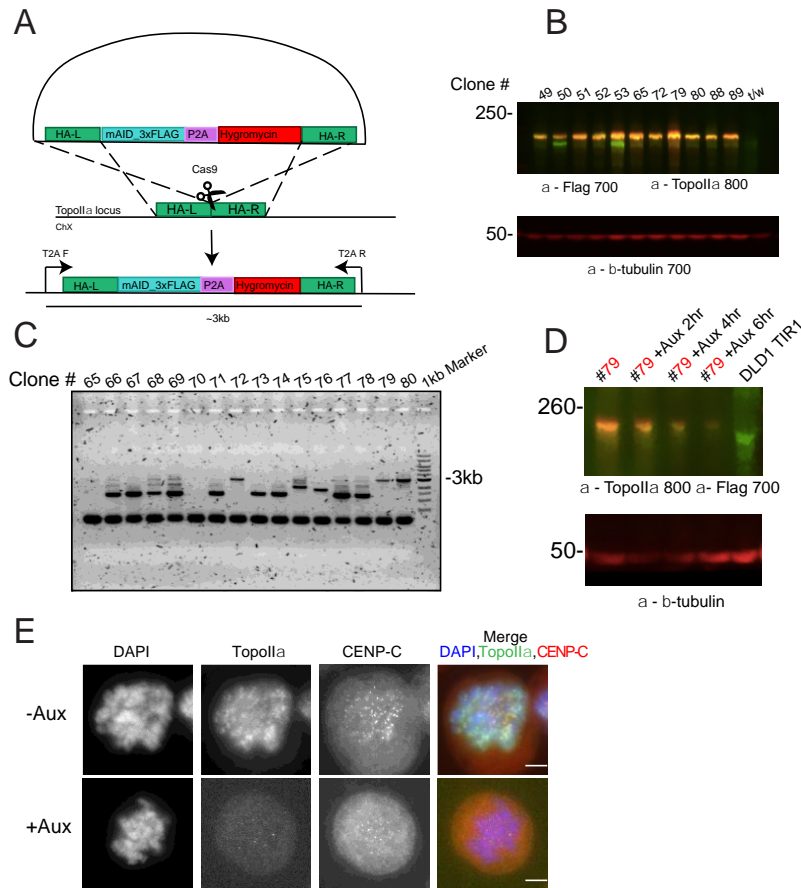

Supplemental Figure 2

### Supplemental Figure S2. Construction of TopoII $\alpha$ -AID cell line.

(A) Experimental scheme of donor plasmid tagging the 5' end of endogenous TopoII $\alpha$  with AID. Cells were transfected with the donor plasmid together with two different guide RNAs.

(B) After selection with 400ug/mL hygromycin, resistant clones were isolated. Whole cell lysate was obtained from cells and the expression of the transgene was screened by Western blotting analysis. Representative Western blotting of clones is shown. An anti-Flag antibody was used to detect AID-Flag tagged TopoII $\alpha$  (~190kDa) in the 700 channel (red) and anti-TopoII $\alpha$  antibodies were used to detect both AID-Flag tagged TopoII $\alpha$  and untagged TopoII $\alpha$  (~160kDa) in the 800 channel (green). Anti- $\beta$ -tubulin was used as a loading control.

(C) Genomic DNA from hygromycin resistant clones was extracted for PCR analysis using indicated primers shown in A. Representative result of PCR amplification was shown. Clones showing only 3kb DNA fragment are homozygous AID integrated clones (#72, #79 and #80).

(D) The clone #79 was treated with auxin for 2, 4, and 6-hours, and evaluated the TopoII $\alpha$  depletion by Western blotting. As a control, DLD-1 OsTIR1#50 parental cells were treated with auxin for 6 hours (DLD1 TIR1). Whole cell lysates were subjected to Western blotting analysis using indicated antibodies. Clone #79 was chosen for further analysis in the subsequent experiments showed in Figure 2.

(E) DLD-1 cells with endogenous TopoII $\alpha$  tagged with an auxin inducible degron (AID) were synchronized in mitosis and treated with auxin 6 hours after Thymidine release. Cells were plated onto fibronectin coated coverslips and subsequently stained with anti-TopoII $\alpha$ , anti-CENP-C, and DNA was labeled with DAPI. TopoII $\alpha$  foci on mitotic chromosomes are completely eliminated with auxin treatment.

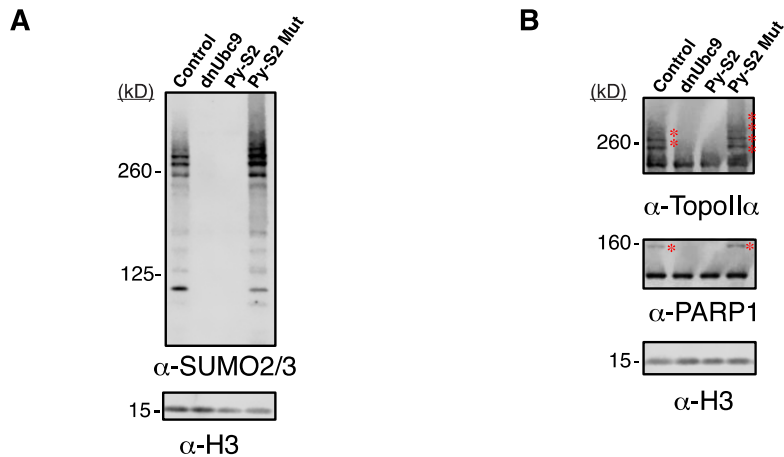

Supplemental Figure 3

**Supplemental Figure S3. Testing SUMO modulating proteins in the *Xenopus laevis* egg extract system.**

(A) Recombinant Py-S2 or Py-S2 Mut proteins were added to *Xenopus laevis* egg extract upon induction of mitosis, and the chromosomes were isolated. Chromosome samples were subjected to Western blotting with anti-SUMO2/3 antibody.

(B) Chromosome samples in A were subjected to Western blotting with anti-*Xenopus* TopoII $\alpha$  antibody to detect both TopoII $\alpha$  (~160kDa) and SUMOylated TopoII $\alpha$  (marked with red asterisks), and anti-*Xenopus* PARP1 antibody to detect both PARP1 (~100kDa) and SUMOylated PARP1 (marked with red asterisks). Anti-histone H3 antibody was used as a loading control.

30nM of Py-S2 protein was sufficient to eliminate chromosomal SUMOylation, which is the equivalent concentration of endogenous PIASy protein in XEE, suggesting that the Py-S2 effectively deSUMOylates chromosomal SUMOylated proteins at a physiologically relevant concentration. Note that the concentration of dnUbc9 required for complete inhibition of chromosomal SUMOylation is 5 $\mu$ M in XEE, which is not within the physiological range and is difficult to induce a high expression level of dnUbc9 in cells. Addition of the Py-S2 C548A mutant (Py-S2 Mut) increased SUMO2/3 modification in chromosomal samples, including both TopoII $\alpha$  SUMOylation and PARP1 SUMOylation. This suggests that the Py-S2 Mut acts as a dominant mutant for stabilizing SUMOylation.

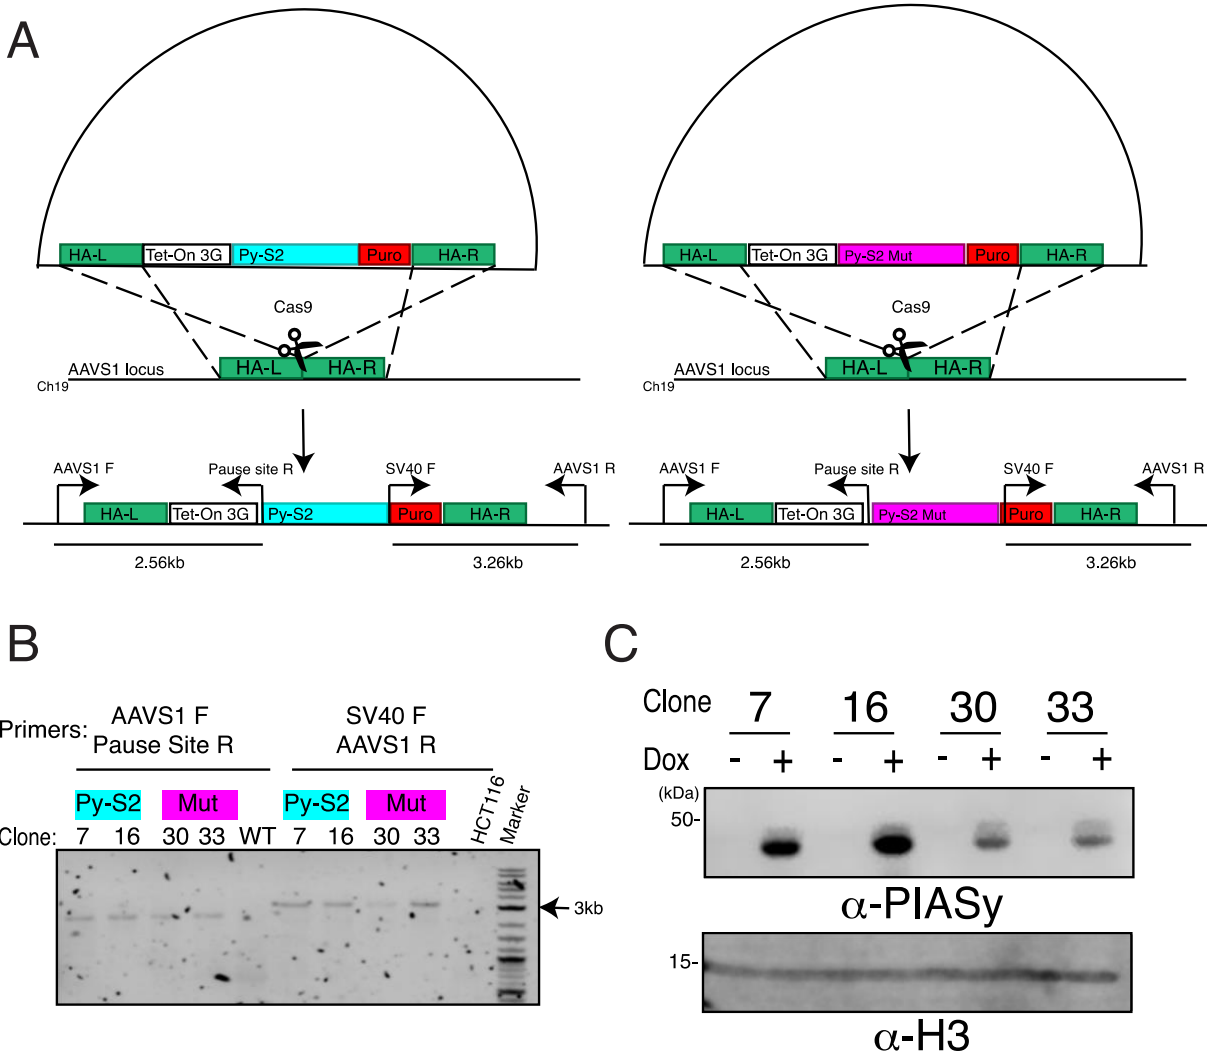

Supplemental Figure 4

**Supplemental Figure S4. Construction of Py-S2 and Py-S2 Mut HCT116 cell lines.**

(A) Experimental scheme to introduce inducible Py-S2 and Py-S2 Mut into AAVS1 locus of HCT116 cells. Cells were transfected with a modified form of pMK243 (obtained from Addgene) AAVS1-TetON3G-Py-S2 (or Py-S2 Mut)-Puro-AAVS1 and AAVS1 T2 CRISPR/Cas9 to target AAVS1 locus. For the screening of the transgene integrated clones, primers were designed to amplify the 5' region (2.56kb) and 3' region (3.26kb) of the integration site respectively.

(B) After the selection using 1 $\mu$ g/mL Puromycin, 2 clones each per construct were further subjected to genomic PCR to confirm the integration of the transgene.

(C) The whole cell lysates obtained from the candidate clones were subjected to Western Blotting to confirm the inducible expression of Py-S2 and Py-S2 Mut proteins. Anti-PIASy antibodies were used to detect expression of fusion proteins (+Dox) or not (-Dox), anti-H3 antibodies were used as a loading control.

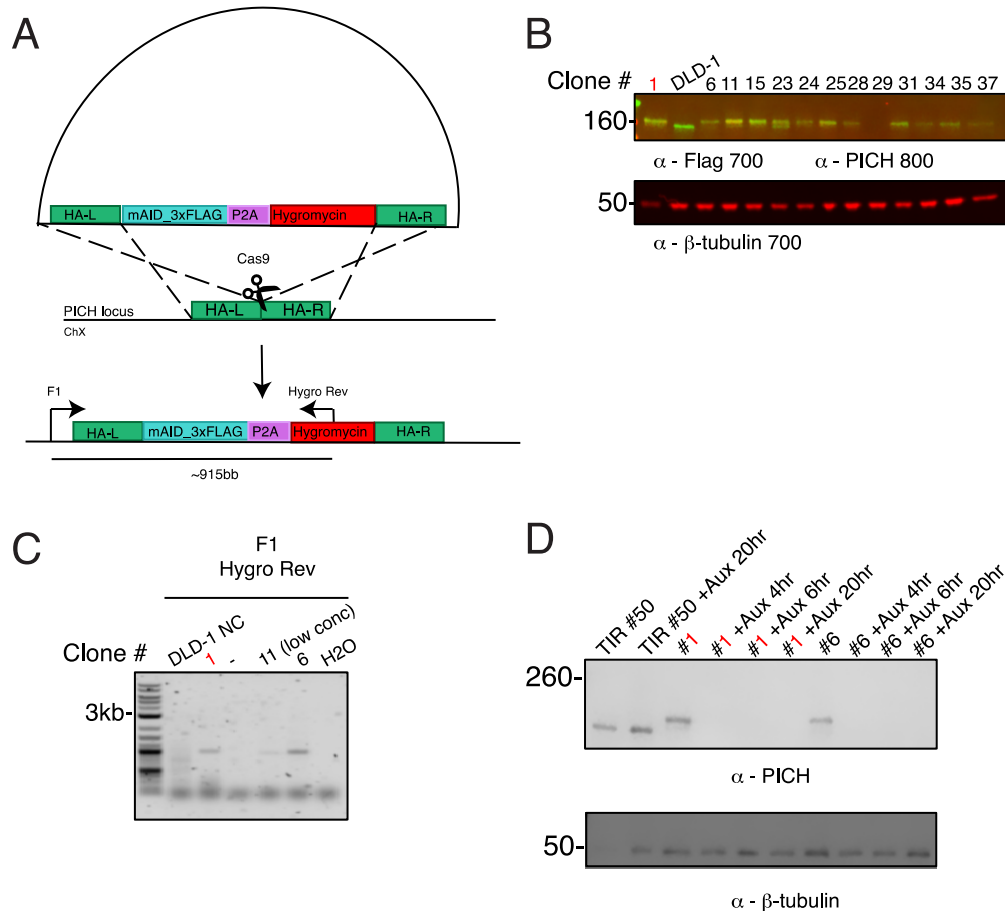

Supplemental Figure 5

### Supplemental Figure S5. Construction of PICH-AID cell line.

(A) Experimental scheme of donor plasmid used to tag the 5' end of endogenous PICH locus with AID tag. Cells were transfected with PICH-mAID-3xFlag-P2A-Hygromycin donor and two different guide RNAs. After selection with 400ug/mL hygromycin clones were isolated, whole cell lysates were collected from asynchronous populations, and Western blotting was performed.

(B) Representative Western blot for hygromycin-resistant clone screening is shown. An anti-Flag antibody was used to detect AID-Flag tagged PICH (~180kDa) in the 700 channel (colored red) and anti-PICH antibodies were used to detect both AID-Flag tagged PICH (~180kDa) and untagged PICH (~150kDa) in the 800 channel (colored green). Non-transfected DLD-1 TIR1#50 parental cell line (labeled DLD-1) was used as a negative control. Anti-β-tubulin was used as a loading control. Among thirteen samples analyzed, the clones which showed a single yellow PICH band were chosen for genomic PCR analysis (clones #1, 6 and 11).

(C) Genomic DNA was isolated and subjected to PCR using an F1 primer located upstream of the left homology arm and Hygro Rev PCR primer located within the insert. Non-transfected DLD-1 TIR#50 parental cell DNA was used as a control (DLD-1 NC).

(D) The clones 1 and 6 were tested for further depletion of PICH protein by auxin addition at 4, 6, and 20-hour time points. The non-transfected DLD-1 TIR1#50 parental cells were used as a control with either non-treated (TIR#50) or treated with auxin for 20 hours (TIR#50 +Aux 20 hours). The whole cell lysates were subjected to Western blotting analysis. Anti-PICH antibodies were used to detect PICH (~150kDa) or PICH-AID (~180kDa), anti-β-tubulin antibodies were used as a loading control. Clone #1 (marked in red) was chosen to utilize for subsequent experiments showed in Figure 5 and Figure S6.

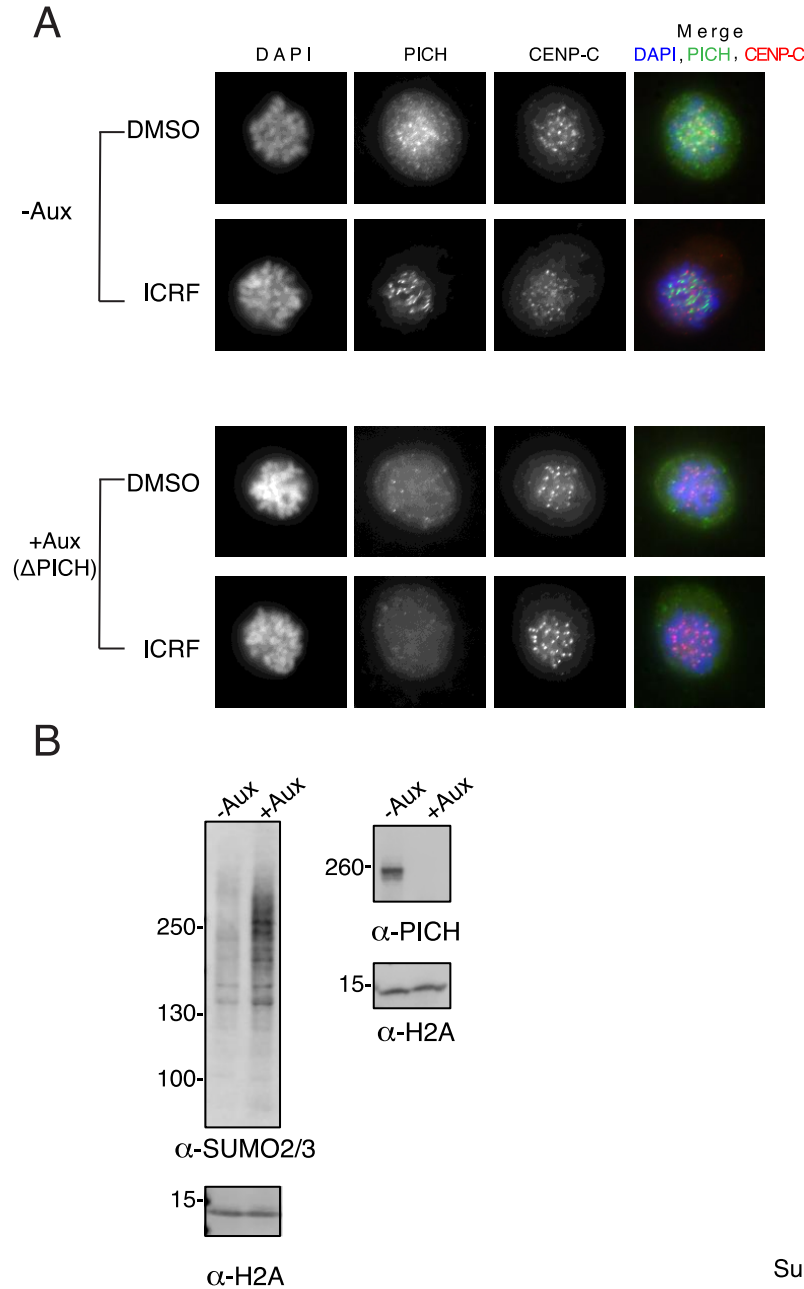

Supplemental Figure 6

**Supplemental Figure S6. Elimination of AID-tagged PICH foci on mitotic chromosomes by addition of auxin, and effect of PICH depletion on chromosomal SUMO2/3 modified proteins.**

(A) DLD-1 cells with endogenous PICH tagged with an auxin inducible degron (AID) were synchronized in mitosis and treated with DMSO or ICRF-193. Auxin was added 6 hours after Thymidine release. Mitotic cells obtained by shake-off were plated onto fibronectin coated coverslips and subsequently stained with indicated antibodies. DNA was labeled with DAPI. PICH foci on mitotic chromosomes were completely eliminated with auxin in both DMSO and ICRF-193 treated cells.

(B) Isolated mitotic chromosomes were subjected to Western blotting with indicated antibodies. Signals of SUMO2/3 modified chromosomal proteins are increased in +Auxin ( $\Delta$ PICH) sample.

**Primers used for amplification of homology arms**

|                                  |                                                                                                               |
|----------------------------------|---------------------------------------------------------------------------------------------------------------|
| RCC1 Left HA Forward             | GGAATTCATATGGGAGGCAATGGGACTGGAACCC                                                                            |
| RCC1 Left HA Reverse             | GAAGATCTAGACTGCTCTTTGTCCTTGACCAAGAGTACAGTATGCTG<br>ACCTCCAGAGCTAACGCTCAGAACAACCTCTATTCTCCAGCTGTTTGC<br>CCATCA |
| RCC1 Right HA Forward            | CCGCTCGAGTGATGAAGCCTCTGAGGGCCTGG                                                                              |
| RCC1 Right HA Reverse            | ATAGTTTAGCGGCCGCCTATATCCTATTTTCTCAGCCACTGTACAAG                                                               |
| PICH Left HA Forward             | CGGACATGTACACTCCGTGTCTCGAAGGCAG                                                                               |
| PICH Left HA Reverse             | GCCGTCGACGACCCTCGGATTGGGTTTCAGTTACC                                                                           |
| PICH Right HA Forward            | GAACTAGTATGGAGGCATCCCGAAGGTTTCCGGAAGCCGATGCC                                                                  |
| PICH Right HA Reverse            | GCGGCCGCCTCTTGCCACGCCATCCCT                                                                                   |
| Topoll $\alpha$ Left HA Forward  | ggctgcctgtccagaaagc                                                                                           |
| Topoll $\alpha$ Left HA Reverse  | ctcaagaaccctgaaagcgactaaacagg                                                                                 |
| Topoll $\alpha$ Right HA Forward | accATGGAAGTGTACCATTGCAGG                                                                                      |
| Topoll $\alpha$ Right HA Reverse | CCTGCATACATTATTTACCGAGTGCCTA                                                                                  |

**gRNA sequences used for Cas9 targeting of RCC1 locus or PICH locus**

|                         |                      |
|-------------------------|----------------------|
| gRNA Rcc1-1             | GACACAGATAAGACCACA   |
| gRNA Rcc1-2             | CTTATCTGTGTCCAGCGG   |
| gRNA PICH-1             | CCTCGGATTGGGTTCCAGTT |
| gRNA PICH-2             | CCGAAGGTTTCCGGAAGCCG |
| gRNA Topoll $\alpha$ -1 | ttccatggtgacggtcgtga |
| gRNA Topoll $\alpha$ -2 | cccgcgagccgtacctgcaa |
| gRNA Topoll $\alpha$ -3 | aaccctgaaagcgactaaac |

**Primers used for genomic PCR**

|              |                                |
|--------------|--------------------------------|
| AAVS1 F      | CTGCCGTCTCTCTCCTGAGT           |
| Pause Site R | gttttgatggagagcgtatgtagtac     |
| Sv40 F       | ccgAGATCTctctagaggatctttgtgaag |
| AAVS1 R      | CAAAAGGCAGCCTGGTAGAC           |
| RCC1 F       | gccatggaggtcctgtagaa           |
| RCC1 Rev     | ACACCTGAGGGGCAAGAGTA           |
| TIR Rev      | TGAAGTCGGCGAAGT                |
| TIR F        | TCTTCACTGGTGTCAATGTAT          |
| PICH F1      | acggggtgtcaccatthtagcc         |
| Hygro Rev    | TCAGCGAGAGCCTGACCTAT           |
| T2A F        | CAATGTGCTGCGAATACAGACTC        |
| T2A R        | cagacacatattatctcaccaagtgg     |

Supporting Information Table
